# A Mechanism of Real-Time Noise Modulation in Neurons

<sup>1</sup>Sharmila Venugopal\*, <sup>1</sup>Soju Seki, <sup>5</sup>David H Terman, <sup>3</sup>Antonios Pantazis, <sup>3</sup>Riccardo Olcese, <sup>4</sup>Martina Wiedau-Pazos, <sup>1,2</sup>Scott H Chandler

<sup>1</sup>Department of Integrative Biology and Physiology

<sup>2</sup>The Brain Research Institute

<sup>3</sup>Departments of Anesthesiology & Perioperative Medicine and <sup>4</sup>Neurology  
David Geffen School of Medicine, University of California Los Angeles

<sup>5</sup>Department of Mathematics  
The Ohio State University

**\*Editorial and manuscript correspondence to SV**

Department of Integrative Biology and Physiology  
University of California Los Angeles  
621, Charles E Young Drive South, LSSA 4214  
Los Angeles, CA 90095  
Phone: (310) 206-0332  
Email: [vsharmila@g.ucla.edu](mailto:vsharmila@g.ucla.edu)

# pages: 25 (including online methods section)

# figures: 9

# words in abstract: 159

# words (Introduction, Results and Discussion): 3345

# references: 36

**Supplementary information included as one separate file:** 4 figures, 1 table and Supplementary information including 2 pieces of model code, 3 pieces of dynamic-clamp C<sup>++</sup> code, and, supplementary text detailing relevant theoretical analyses.

**Author contributions:** SV designed the study and conducted mathematical modeling and simulations with inputs from SHC; DHT and SV performed mathematical analyses; SS conducted *in vitro* patch-clamp electrophysiology and SV and SHC provided supervision; SS and AP performed the dynamic-clamp experiments with inputs from SV and RO provided supervision; AP implemented the Markov model and SV tested it; MWP generated the mice for the study; SV made the figures and wrote the manuscript; All the authors contributed to the final version.

## Additional Information

## Competing Interests

The authors declare no competing interests.

37           **Uncertainties pose an ongoing challenge for information processing in the nervous system.**  
38 **It is not entirely clear how neurons maintain dynamic stability of information, encoded in the**  
39 **temporal features of spike trains, notwithstanding stochastic influences. Here we examined the**  
40 **contribution of subclasses of membrane sodium currents in real-time noise modulation in sensory**  
41 **neurons. Fast sodium ( $\text{Na}^+$ ) currents are essential for spike generation, and a persistent  $\text{Na}^+$  current**  
42 **can entrain preferred input frequencies via membrane resonance. Using mathematical modeling,**  
43 **theory and experiments, we show that a resurgent  $\text{Na}^+$  current can stabilize the temporal features**  
44 **of burst discharge and confer noise tolerance. These novel insights reckon the role of biophysical**  
45 **properties of  $\text{Na}^+$  currents beyond mere spike generation. Instead, these mechanisms might be how**  
46 **neurons perform *real-time* signal processing to maintain order and entropy in neural discharge.**  
47 **Our model analysis further predicts a negative feedback loop in the molecular machinery of an**  
48 **underlying Nav1.6-type  $\text{Na}^+$  channel gating considered in this study.**

49  
50           Real-time signal detection in uncertain settings is a fundamental problem for information and  
51 communication systems. Our nervous system performs the daunting task of extracting meaningful  
52 information from natural environments and guides precise behaviors in *real-time*. Sensory neurons for  
53 instance use efficient coding schemes such as bursting that aid information processing <sup>1</sup>. Mathematical  
54 models of bursting have helped explain the basic structure of an underlying dynamical system as one in  
55 which, a slow process dynamically modulates a faster spike-generating process, leading to stereotypical  
56 alternating phases of spiking and quiescence <sup>2,3</sup>. The so-called *recovery period* of the slow process governs  
57 the intervals between bursts which is often susceptible to random perturbations. Uncertainty in spike/burst  
58 intervals can alter the timing precision and information in a neural code<sup>4</sup>. Consequently, a mechanism that  
59 can control the refractoriness of spike and burst intervals notwithstanding stochastic fluctuations, may  
60 maintain order in neural spike trains and aid information processing. Here we examined a candidate  
61 mechanism involving neuronal voltage-gated  $\text{Na}^+$  currents for a role in stabilization of burst discharge  
62 (durations and intervals), that can be important for real-time noise modulation.

63           Voltage-gated  $\text{Na}^+$  currents are compulsory for spike generation in neurons. The molecular and  
64 structural diversity of  $\text{Na}^+$  channels and the resultant functional heterogeneity and complexity, suggest  
65 their role beyond mere spike generation <sup>5</sup>. For instance, in addition to the fast/transient  $\text{Na}^+$  current ( $I_{\text{NaT}}$ )

66 mediating action potentials, a subthreshold activated persistent Na<sup>+</sup> current ( $I_{NaP}$ ) participates in the  
67 generation of subthreshold membrane oscillations (STO) (e.g., see<sup>6</sup>). These oscillations can lead to  
68 membrane resonance by which, a neuron produces the largest response to oscillatory inputs of some  
69 preferred frequency<sup>7, 8</sup>. Neurons utilize this mechanism to amplify *weak* synaptic inputs at resonant  
70 frequencies<sup>9</sup>. The slow inactivation and recovery of  $I_{NaP}$  further provides for the slow process required  
71 for burst generation<sup>10</sup> and therefore contributes to efficient information processing in multiple ways.  
72 However, during ongoing activity, random fluctuations can alter the precision and order of bursts, that can  
73 distort/diminish the information in neural code. Here, we provide evidence that a frequently observed Na<sup>+</sup>  
74 resurgent current ( $I_{NaR}$ ) known to arise from an unusual open-channel unblocking of sodium channels<sup>11</sup>,  
75 might be a mechanism by which neurons arbitrate uncertainty and maintain order in spike trains. Some  
76 Na<sup>+</sup> channels such as the Nav1.6-type mediate all the three currents, namely,  $I_{NaT}$ ,  $I_{NaP}$ , and  $I_{NaR}$  and  
77 here we show that these biophysical properties can confer *real-time* signal processing capacity to neurons.

## 78 **Results**

79 A workflow including the approaches that we used to examine the contribution of biophysical  
80 properties of a neuron in shaping its signal processing capacity, is shown in **Fig. 1**. First, using  
81 mathematical modeling we assembled the known biophysical properties of Nav1.6-type Na<sup>+</sup> currents  
82 using a conductance-based Hodgkin-Huxley formalism<sup>12</sup>; we incorporated the model conductances into a  
83 realistic neuron model and were able to reproduce experimentally observed stereotypical bursting (**Fig.**  
84 **1a**). To test the effects of the model Na<sup>+</sup> currents in real neurons and to validate our predictions, we used  
85 real-time closed-loop dynamic-clamp experiments in intrinsically bursting proprioceptive sensory neurons  
86 in the brainstem (**Fig. 1b**). Furthermore, model stability analyses, and uncertainty measurements were  
87 combined to explain the observed behaviors (**Fig. 1c**). Specifically, **Figs. 2** and **3** provide a description of  
88 the model  $I_{Na}$ , and its novel  $I_{NaR}$  component; **Figs. 4, 5** and **6** show how  $I_{NaR}$  can exclusively modulate

89 burst refractoriness by a putative negative feedback loop in the Na<sup>+</sup> channel gating; **Figs. 7 and 8** provide  
90 evidence for  $I_{NaR}$ 's ability for real-time noise modulation. **Figure 9** sums up the workings of  $I_{NaR}$  and  
91  $I_{NaP}$  and their co-contribution to signal processing in neurons.

92 We began by formulating a conductance-based model for the Nav1.6-type Na<sup>+</sup> currents. **Figure**  
93 **2a** illustrates the total  $I_{Na}$  as a sum of the three components in our model: transient,  $I_{NaT}$ , resurgent,  $I_{NaR}$ ,  
94 and, persistent,  $I_{NaP}$  currents. The classic  $I_{NaT}$  has fast inactivation, on the order of 1 ms. The novel  $I_{NaR}$   
95 shows decay kinetics on the order of 10 ms, and the  $I_{NaP}$  shows slow inactivation and recovery, on the  
96 order of 1000 ms. We established the above formulation for  $I_{Na}$  with distinct conductances for the three  
97 components to permit examination of their exclusive contributions to neural dynamics, since these  
98 components are experimentally inseparable<sup>13-15</sup>. Given these macroscopic currents may arise from a single  
99 channel, we also implemented a state-based Markovian  $I_{Na}$  model<sup>16</sup> that does not dissociate the three  
100 components and ensured qualitative and quantitative similarities in the total  $I_{Na}$  during spiking in both  
101 models (see **Supplementary Fig. 1**). We further confirmed that our model  $I_{Na}$  satisfies the key  
102 contingencies of Na<sup>+</sup> channels carrying  $I_{NaR}$  (see **Supplementary Fig. 2**).

103 We incorporated the model  $I_{Na}$  into a conductance-based single-compartment neuron model (see  
104 schematic and membrane voltage trace in black in **Fig. 2b**). Together with a minimal set of Na<sup>+</sup>, K<sup>+</sup> and a  
105 leak conductance, the model neuron faithfully reproduced the expected rhythmic burst discharge observed  
106 in proprioceptive brainstem Mesencephalic V (Mes V) sensory neurons; The  $I_{Na}$  generated during action  
107 potentials is shown in expanded time in the figure (red trace). **Figure. 2c** shows a real-time closed-loop  
108 dynamic-clamp experiment in an intrinsically bursting Mes V neuron. The control burst was generated by  
109 simply driving the neuron with a step depolarization, following which, we blocked action potential  
110 generation by bath application of tetrodotoxin (1 μM TTX) (see black horizontal bar in **Fig. 2c**).  
111 Subsequently, we introduced the model  $I_{Na}$  in real-time during TTX application and by adjusting the

112 conductances of the three  $I_{Na}$  components suitably, we were able to regenerate action potential bursts (see  
113 **Methods** on choice of conductance values); The dynamic-clamp  $I_{Na}$  generated during action potentials is  
114 shown in expanded time in the figure for comparison with the model simulation in **Fig. 2b** (red trace).

### 115 **A novel formalism for resurgent $Na^+$ current**

116 The total  $I_{Na}$  in our model has a novel resurgent component,  $I_{NaR}$ ; the transient and persistent  
117 components are similar to our previous formalism <sup>7</sup>. **Figure 3a (left panel)** illustrates the proposed  
118 mechanism of  $Na^+$  resurgence <sup>16</sup>, wherein a putative blocking particle occludes an open channel following  
119 a brief depolarization such as during an action potential; subsequently during repolarization, a voltage-  
120 dependent unblock results in a resurgent  $Na^+$  current. Our  $I_{NaR}$  formulation recapitulates this unusual  
121 behavior of  $Na^+$  channels using nonlinear ordinary differential equations for a blocking variable ( $b_r$ ) and  
122 a competing inactivation ( $h_r$ ) (see **Methods**). The resultant macroscopic  $I_{NaR}$  is gated by the unblocking  
123 process represented by  $(1 - b_r)$ , wherein ‘1’ represents all open channels and  $b_r$  reflects the proportion  
124 of channels in blocked state at any instant: the steady-state voltage dependency of unblock,  $(1 - br_{\infty}(V))$ ,  
125 and the competing inactivation ( $hr_{\infty}(V)$ ), in the model are shown in **Fig. 3a (middle panel)**, along with  
126 the equation for  $I_{NaR}$ ; the purple shaded region highlights the voltage-dependency of  $I_{NaR}$  activation  
127 during open-channel unblock. In **Fig. 3a (right panel)**, we show simulated  $I_{NaR}$  (in red), peaking during  
128 the recovery phase of spikes (in black). In **Fig. 3b (I.)**, we reproduced experimentally observed  $I_{Na}$  and  
129 highlight the resurgent component in both model (*left*) and experiment (*right*), (inset shows experimental  
130 protocol; also see legend and **Methods**). A comparative current-voltage relationship for the model and  
131 experiments is shown in **Fig. 3b (II.)**; also see **Supplementary Fig. 3** for detailed kinetics of model  $I_{NaR}$ .

### 132 **Resurgent $Na^+$ and its control of spike and burst intervals**

133 Given that  $I_{NaR}$  is activated during the recovery phase of an action potential, physiologically, any  
134 resulting rebound depolarization may control the spike refractory period, and increase spike frequency

135 and burst duration<sup>17,18</sup>. We tested this by selectively increasing the maximal resurgent conductance  $g_{NaR}$   
136 in our model neuron simulation and in dynamic-clamp experiments as shown in **Figs. 4a** and **b**. We  
137 quantified the inter-burst intervals (IBIs), burst duration (BD) and inter-spike intervals (ISIs) as shown in  
138 **Fig.4c-e**. As expected, we noted that increasing  $g_{NaR}$ , reduced ISIs and increased BDs. Additionally, we  
139 noted that,  $g_{NaR}$  increase resulted in longer IBIs (see red double arrows in **Figs. 4a, b** and **Fig. 4c**). This  
140 was in contrast with the effects of the persistent Na<sup>+</sup> conductance,  $g_{NaP}$ , that *decreased* IBIs and had  
141 negligible effects on ISIs as shown in **Fig. 5**; both currents increased the BDs (also see **Supplementary**  
142 **Fig. 4** for  $g_{NaR}$  and  $g_{NaP}$  subtraction experiments showing consistent reverse effects).

143 The effects of persistent  $I_{NaP}$  in reducing IBIs can be explained by its sub-threshold activation<sup>7</sup>,  
144 wherein increasing  $g_{NaP}$ , can *promote* burst initiation and therefore reduce IBIs. Additionally, a high  $g_{NaP}$   
145 together with its slow inactivation helps maintain depolarization that can prolong BDs. Its effect on ISI is  
146 negligible, because, once activated, its slow inactivation accumulates between spikes and does not  
147 contribute to rebound depolarization during ISIs. Clearly, one effect that is not immediately obvious is an  
148 increase in IBI due to increases in  $g_{NaR}$ . The intervals between bursts signify the recovery time of the  
149 slow process underlying bursting activity. Our highly reproducible effect of  $g_{NaR}$  on IBIs in sensory Mes  
150 V neurons using dynamic-clamp experiments and its qualitative and quantitative similarities with the  
151 model prediction clarifies that this slow recovery process is indeed the slow inactivation/recovery variable  
152 for  $I_{NaP}$  as in the model. As such, we examined the  $g_{NaR}$  mechanism of IBI control by further analyses of  
153 the simulated membrane potential (grey traces) and the slow  $I_{NaP}$  inactivation/recovery variable (overlaid  
154 magenta traces) of the model neuron under three conditions shown in **Figs. 6a-c**: 1) with control values  
155 of  $g_{NaR}$  and  $g_{NaP}$  (**Fig. 6a**), 2) an increase in  $g_{NaP}$  compared to control (**Fig. 6b**), and, 3) an increase in  
156  $g_{NaR}$  compared to control (**Fig. 6c**). The peak and trough of the slow inactivation/recovery correspond to  
157 burst *onset* and *offset* respectively. Comparing these traces in the three panels, we note that an increase in

158  $g_{NaR}$  effectively *facilitated* the slow inactivation during a burst (see curvy arrow in **Fig. 6c** and legend).  
159 This observation was further supported by estimations of theoretical thresholds for *burst onset* and *offset*  
160 for increasing values of  $g_{NaR}$  (**Fig. 6d**) and, similar thresholds for increasing values of  $g_{NaP}$  are provided  
161 for comparison in **Fig. 6e** (see legend and **Supplementary Information** for details). Note that changes in  
162  $g_{NaR}$  did not alter the burst onset thresholds, consistent with a lack of resurgent current before spike onset  
163 (see brown arrow indicating burst onset threshold in **Fig. 6d**); Whereas, increasing  $g_{NaR}$ , consistently  
164 *lowered* the burst offset threshold for the slow inactivation/recovery (see highlighted dashed box with  
165 arrows pointing to the burst offset thresholds decreasing with increasing  $g_{NaR}$  values in **Fig. 6d**). The net  
166 effect is longer recovery time between bursts and therefore prolonged IBIs. Additionally, in **Fig. 6d**, an  
167 increase in  $g_{NaR}$  extended the range of slow inactivation/recovery for which stable bursting regime exists  
168 (marked by the green circles). This *gain in stability* is indicative of a *negative feedback loop* in the  $Na^+$   
169 channel gating mechanism. As shown in **Fig. 6f** (see boxed inset), during a burst, presence of channel  
170 unblocking mechanism and the resulting resurgent  $Na^+$  can facilitate slow channel inactivation, however,  
171 increasing inactivation, eventually shuts off the unblocking events as more channels inactivate (see  
172 arrows), and this terminates the burst. The schematic on the left summarizes a negative feedback loop  
173 between the unblocking and slow inactivation processes of  $Na^+$  channels.

#### 174 **Burst refractoriness and noise tolerance offered by $Na^+$ currents**

175 During quiescence/recovery periods between bursts, the membrane voltage can be perturbed by  
176 ambient noise and stochastic inputs, that can induce abrupt spikes and therefore disrupt IBIs. We reasoned  
177 that the gain in stability of burst discharge due to  $g_{NaR}$  might be a mechanism for noise tolerance. To test  
178 this, we introduced a broadband white Gaussian noise to disrupt the rhythmic burst discharge in the model  
179 neuron when no  $g_{NaR}$  was present as shown in **Figs. 7a, b**. Subsequent addition of  $g_{NaR}$  indeed  
180 significantly restored burst regularity (**Fig. 7c**). Model analyses in the  $(h_p, V)$  phase plane provides insight

181 into the mechanism of  $I_{NaR}$  mediated noise tolerance. Briefly, we project a portion of a  $(h_p, V)$  trajectory  
182 corresponding to the termination of one burst until the beginning of the next (see expanded insets in **Figs.**  
183 **7a, b, c**) to the  $(h_p, V)$  diagrams shown in **Figs 7d, e, f** respectively (see **Supplementary Information**  
184 for details). In **Fig. 7d**, beginning at the magenta circle, the  $(h_p, V)$  trajectory (magenta trace) moves to  
185 the right as  $h_p$  recovers during an IBI, until a burst onset threshold is crossed; point where the blue circles  
186 meet the red and black curves (see **Supplementary Information** for details), and eventually bursting  
187 begins; see upward arrow marking a jump-up in  $V$  at the onset of burst. During a burst, while  $V$  jumps up-  
188 and-down during spikes,  $h_p$  moves to the left as slow inactivation accumulates during bursting (left  
189 arrow). Finally, when  $h_p$  reduces sufficiently,  $(h_p, V)$  gets closer to the burst offset threshold (points at  
190 which the green and blue circles meet), and the burst terminates (down arrow). *What is key in this figure*  
191 *is that the IBI is well-defined as the time period in which the  $(h_p, V)$  trajectory moves along the red curve*  
192 *of steady states during the recovery process and moves past the burst onset threshold until a burst begins.*  
193 However, when stochastic influences are present, the recovery period near-threshold is subject to random  
194 perturbations in  $V$  and can cause abrupt jump-up/spikes during the recovery period (see expanded inset in  
195 **Fig. 7b**). Projecting  $(h_p, V)$  during this period on to **Fig 7e**, we note that the near-threshold noise  
196 amplitudes can occasionally push the  $(h_p, V)$  trajectory (magenta) above a green region of attraction and  
197 this results in such abrupt spikes. Now, when  $g_{NaR}$  is added, the apparent restoration of burst regularity  
198 (see **Fig. 7c**) can be attributed to an expansion in this green shaded region as shown in **Fig. 7f** (see arrow  
199 pointing to a noise-tolerant region). In this situation, near-threshold random perturbations have less of an  
200 effect during the recovery process to induce abrupt spikes. *This way,  $I_{NaR}$  filters random perturbations at*  
201 *burst offset and in turn contributes to burst refractoriness.* We suggest that such a mechanism can offer  
202 dynamic stability to neural discharge by damping the effects of random perturbations that can alter the  
203 precision of bursts and therefore aid information processing.



## 204 **Resurgent Na<sup>+</sup> and burst entropy**

205           The spike/burst intervals, their timing precision and order are important for information coding<sup>19-</sup>  
206 <sup>23</sup>. Given our prediction that  $I_{NaR}$  can offer noise tolerance and stabilize burst discharge, we examined  
207 whether it can reduce uncertainty in spike/burst intervals and restore order in burst discharge. We tested  
208 this using model simulations and also verified the predictions using real-time dynamic-clamp experiments  
209 as shown in **Fig. 8a - d**. In both simulations and *in vitro* dynamic-clamp experiments, we disrupted the  
210 inter-event intervals (IEIs) by adding a broadband white noise input in addition to a constant step  
211 depolarization as shown by spike raster plots in **Figs. 8e and f**. Adding the  $g_{NaR}$  conductance successfully  
212 restored the order of bursts. We used Shannon's entropy as a measure of uncertainty in IEIs and show that  
213 increases in entropy up on noise addition could be reduced to control levels by addition of  $I_{NaR}$  as in **Fig.**  
214 **8g** (see **Methods**). We also quantified the Coefficient of Variation (CV) and note that adding noise which  
215 primarily reduced burst intervals, indeed decreased the CV, due to reduced standard deviation (s.d.) of the  
216 IEI distribution. Subsequent addition of  $I_{NaR}$ , which significantly lengthened the IBIs, resulted in  
217 increases in CV values due to an increase in IEI s.d. Taken together, we suggest that  $I_{NaR}$  can serve an  
218 important role in information processing through its contribution to maintaining order and precision of  
219 spike/burst intervals in *real-time*.

220

## 221 **Discussion**

222           Using a unique combination of mathematical modeling, simulations, theory and real-time closed-  
223 loop experiments, we demonstrate a novel consequence of complex Na<sup>+</sup> currents in burst control, noise  
224 modulation and information processing in sensory neurons. While the subclasses of Na<sup>+</sup> currents presented  
225 here are experimentally inseparable, our unique and simplified modeling approach combined with *in silico*  
226 *knock-in* of each Na<sup>+</sup> current component in closed-loop dynamic-clamp experiments, allowed examination

227 of their individual contributions in shaping the neural discharge. Additionally, theoretical analyses  
228 revealed a putative negative feedback loop in the Nav1.6-type Na<sup>+</sup> channel gating mechanism. These  
229 results portend the apparent consequences on burst control and signal processing capacity of neurons when  
230 these currents are present.

231

### 232 **Stabilization of burst discharge and negative feedback loop in Na<sup>+</sup> channel gating**

233 In contrast with  $I_{NaP}$ , which drives near threshold behavior and burst generation,  $I_{NaR}$  facilitated  
234 slow channel inactivation as bursts terminate (also note <sup>10</sup>). Increased channel inactivation due to  $I_{NaR}$  in  
235 turn prolonged recovery from inactivation required to initiate subsequent burst of activity. Such an  
236 interaction between open-channel unblock process underlying  $I_{NaR}$ , and, the slow inactivation underlying  
237  $I_{NaP}$ , offer a closed-loop *push-pull* modulation of IBIs, suggesting a negative feedback control of sodium  
238 channel activity by resurgent and persistent mechanisms during ongoing bursts. Specifically, presence of  
239  $I_{NaR}$  facilitates slow Na<sup>+</sup> inactivation as shown by our theoretical analyses of model behavior; such  
240 enhanced slow channel inactivation eventually shuts off channel opening and unblocking. This resulted  
241 in stabilization of the burst structure and regulation of IBIs. Theoretically, this represents an enlarged  
242 separatrix (or boundary) for transitioning from a sub-threshold non-spiking behavior to bursting behavior  
243 (see enlarged green shaded region in **Fig. 7f**), and the neuron becomes refractory to burst generation. Such  
244 burst refractoriness was also the basis for noise tolerance.

245 Is this apparent effect of  $I_{NaR}$  physiologically plausible? Biophysical studies indicate that recovery  
246 from fast inactivation is facilitated in sodium channels that can pass resurgent current <sup>16</sup>; as shown here,  
247 this appears to be true for slow inactivation as well. Consistently, in the SCN8a knockout Med mouse,  
248 which lack the Nav 1.6 sodium channel subunit, recordings from mutant cells showed an absence of  
249 maintained firing during current injections, limited recovery of sodium channels from inactivation, and

250 failure to accumulate in inactivated states. This is attributed to a significant deficit in  $I_{NaR}$ <sup>10, 17, 24</sup>.  
251 Furthermore, maintained or repeated depolarization can allow a fraction of sodium channels in many  
252 neurons to enter inactivation states from which recovery is much slower than for normal fast inactivation  
253 (reviewed in<sup>25</sup>). Here, our simulations and model analyses predict that the presence, and increase in  $I_{NaR}$   
254 conductance, provides for a such a physiological mechanism to maintain sustained depolarization and  
255 promote fast and slow channel inactivation.

256

### 257 **Sodium currents and signal processing in neurons**

258       Neuronal voltage-gated Na<sup>+</sup> currents are essential for action potential generation and propagation,  
259 a mechanism explained by the classic Hodgkin-Huxley model<sup>12</sup>. However, to enable fight-or-flight  
260 responses, an overt spike generation mechanism must be combined with *real-time* filters to extract  
261 biologically relevant inputs from an uncertain input space. Here we show that, the complex biophysical  
262 properties of Na<sup>+</sup> channels, can serve a role in *real-time* signal processing. A sub-threshold activated  
263 persistent Na<sup>+</sup> current is known to contribute to membrane resonance, a mechanism of band-pass filtering  
264 of preferred input frequencies<sup>8</sup>. We call this type of input gating, which is widely known to be important  
265 for brain rhythms<sup>8, 22</sup>, a *tune-in* mechanism. Stochastic influences such as ambient noise and synaptic  
266 activity, can heighten the efficacy of a tune-in mechanism by amplifying weak inputs and can indeed  
267 promote signal detection<sup>26, 27</sup>. Furthermore, the persistent Na<sup>+</sup> current is important for burst generation  
268 and therefore also contributes to efficient coding<sup>28, 29</sup>. Then again, a resurgent Na<sup>+</sup> current, that turns on  
269 during the repolarizing phase of an action potential, can facilitate further spike generation by providing  
270 an after-depolarization<sup>17</sup>. Here we show that this mechanism can stabilize burst duration and intervals and  
271 maintain order of burst discharge in the presence of stochastic inputs. During ongoing sensory processing,  
272 we think that this can provide for a real-time *tune-out* mechanism, which stabilizes the bursts encoded due

273 to a detected input signal. This indeed needs to be validated in the presence of natural stimuli. However,  
274 our model predictions, analyses and experimental validation based on a broadband noise and step input  
275 strongly supports such a putative role. As summarized in **Fig. 9**, sensory neurons can utilize these  
276 biophysical properties as a *real-time tune-in-tune-out* mechanism for gating preferred inputs and  
277 dynamically attenuate random membrane fluctuations which can decrease uncertainty in neural code<sup>30</sup>.

278

## 279 **Figure Legends**

280 **Figure 1. A workflow showing the study components and approaches.** **a)** Development of a  
281 mathematical models for Nav1.6-type Na<sup>+</sup> current components. This is incorporated into a minimal  
282 conductance-based model for a bursting neuron to investigate putative roles for these currents in neural  
283 dynamics. **b)** Model predictions are iteratively validated using real-time closed-loop dynamic-clamp  
284 experiments in brainstem proprioceptive sensory neurons. **c)** The observed effects on neural discharge are  
285 explained using theoretical stability and uncertainty analyses.

286 **Figure 2. Ionic conductance-based model for Nav1.6 type Na<sup>+</sup> currents with three components.** **a)** A  
287 simulated trace showing  $I_{Na}$ ; the tree map shows each of the three components: transient  $I_{NaT}$ , resurgent  
288  $I_{NaR}$ , and, persistent  $I_{NaP}$ ; These are also highlighted by the color-matched dashed boxes in the top panel.  
289 The  $\tau_{decay}$  shows the order of magnitude of the decay kinetics of the three components. **b) Left:** A  
290 schematic showing a conductance-based minimal model for a bursting neuron with the  $I_{Na}$  incorporated;  
291 also shown are potassium ( $I_K$ ) and leak ( $I_{leak}$ ) conductances in the model. **Right:** Model simulation  
292 demonstrates rhythmic burst discharge and inset highlights the  $I_{Na}$  current in the model during action  
293 potentials, in red. **c) Left:** Schematic shows the dynamic-clamp experimental approach in neurons in the  
294 brainstem proprioceptive sensory nucleus (red) in a live brain slice preparation;  $V_m$ , indicates the  
295 membrane potential. **Right:** Membrane potential recorded from a rhythmically bursting sensory neuron;  
296 action potentials were blocked using 1  $\mu$ M TTX, and dynamic-clamp model  $I_{Na}$  was applied to regenerate  
297 spikes; double slanted lines indicate break in time; Inset highlights the dynamic-clamp  $I_{Na}$  in red, during  
298 action potentials.

299 **Figure 3. A novel mathematical model for the unusual resurgent component of the Nav1.6-type Na<sup>+</sup>**  
300 **current.** **a) Left:** Schematic of voltage-dependent of state transitions for a Na<sup>+</sup> channel with a known  
301 mechanism of unusual open-channel block/unblock (green circle); classic inactivation gate is shown in  
302 blue (blue ball and chain). **Middle:** The steady-state voltage-dependencies of open-channel unblocking  
303 ( $1 - br_{\infty}(V)$ ) and a competing inactivation process  $hr_{\infty}(V)$  for the novel resurgent component are shown  
304 (also see Methods and Results); The purple shaded region highlights the voltage range over which  $I_{NaR}$   
305 can be observed during open-channel unblocking. The equation for  $I_{NaR}$  is shown with the blocking ( $b_r$ ),  
306 and, inactivation ( $h_r$ ) gating variables (also see Methods). **Right:** The simulated  $I_{NaR}$  (in magenta) with

307 peaks occurring during the repolarization phase of action potentials (in black) is shown. **b) I.** A comparison  
308 between simulated  $I_{Na}$  and experimentally generated  $I_{Na}$  from voltage-clamp recording is shown; Boxed  
309 inset shows the experimental protocol typically used to test for voltage-dependent activation of  $I_{NaR}$ . **II.**  
310 Graphs show the nonlinear current-voltage relationship of peak resurgent current in the model (magenta)  
311 and average peak resurgent currents measured from voltage-clamp experiments (black); error bars show  
312 standard deviation (n=5 neurons from 5 animals).

313 **Figure 4. Physiological consequences of  $I_{NaR}$  on neural discharge.** **a)** Simulated membrane voltage for  
314 increasing values of  $g_{NaR}$ , and its effect on burst discharge. Value of 1x  $g_{NaR}$  adjusted to match  
315 experimental data in **(b)**. **b)** Dynamic-clamp addition of  $I_{NaR}$  in an intrinsically bursting sensory neuron  
316 and its response to increases in  $g_{NaR}$ ; Values of  $g_{NaR}$  used are 2 and 4 nS/pF for 1X and 2X respectively.  
317 The red double arrows highlight increases in inter-burst interval (IBI) in both **(a)** and **(b)**. **c)** Burst features  
318 are highlighted in the left inset: burst duration (BD), and inter-spike intervals (ISI); box plots show IBI  
319 **(c)**, BD **(d)**, and ISI **(e)** for experimental traces presented in **(b)** in black, and maroon circles show  
320 simulated results. Error bars show minimum and maximum of the distribution for a 10 sec recording  
321 period.

322 **Figure 5. Physiological consequences of  $I_{NaP}$  on neural discharge.** **a)** Simulated membrane voltage for  
323 increasing values of,  $g_{NaP}$ , and its effect on burst discharge; Value of 1x  $g_{NaP}$  was chosen to match  
324 experimental data in **(b)**. **b)** Dynamic-clamp addition of  $I_{NaP}$  in an intrinsically bursting sensory neuron  
325 and its response to increases in  $g_{NaP}$ ; Values of  $g_{NaP}$  used are 0.36 and 0.54 nS/pF for 1X and 1.5X  
326 respectively. The red double arrows highlight reduction in inter-burst interval (IBI) in both **(a)** and **(b)**. **c)**  
327 Burst features are highlighted in the left inset: burst duration (BD), and inter-spike intervals (ISI); IBI **(c)**,  
328 BD **(d)**, and, ISI **(e)** are shown for experimental traces presented in **(b)** in black; Maroon circles show  
329 simulated results. Error bars show minimum and maximum of the distribution for a 10 sec recording  
330 period.

331  
332 **Figure 6. Mechanism of action of  $I_{NaR}$  and  $I_{NaP}$  – Model analyses.** **a-c)** The slow inactivation/recovery  
333 variable is overlaid (magenta) on membrane voltage traces (grey) under control **(a)**, increased  $g_{NaP}$  **(b)**,  
334 and increased  $g_{NaR}$  **(c)** conditions; The dark blue dashed lines in **(a-c)** indicate the maximum and  
335 minimum values of the persistent inactivation variable under control conditions; The light green arrow in  
336 **(b)**, highlights a reduced peak recovery required for burst onset; The light blue curvy arrows in **(b, c)**  
337 indicate reduced slow inactivation for burst termination. **d, e)** Bifurcation diagrams showing the steady-  
338 states and bursting regimes in the membrane voltage ( $V$ ) and slow inactivation/recovery ( $h_p$ ) phase plane.  
339 The red lines represent resting/quiescence states consistent with low values of  $h_p$  recovery. The meeting  
340 point of stable equilibria (red) and unstable equilibria (black solid lines) represents the theoretical  
341 threshold for burst onset (see **Supplementary Information**). The blue open circles are the unstable  
342 periodics that form region of attraction on either side of the stable equilibria for sub-threshold membrane  
343 voltage oscillations; The meeting point of the curve of unstable periodics with the stable periodics (green  
344 filled circles) represents the theoretical threshold for burst offset/termination (see **Supplementary**  
345 **Information**). The dashed boxes in **(d)** and **(e)** highlight shifts in burst offset thresholds due to increases

346 in  $g_{NaR}$  (**d**) and  $g_{NaP}$  (**e**); brown dashed arrows in (**e**) highlight shifts in burst onset thresholds due to  $g_{NaP}$   
347 increases;  $1X\ g_{NaR} = 3.3\ \text{nS/pF}$  and  $1X\ g_{NaP} = 0.5\ \text{nS/pF}$ .

348

349 **Figure 7. Resurgent  $\text{Na}^+$  current stabilizes burst discharge and confers noise tolerance. a - c)**

350 Simulated membrane voltage shows neural activity patterns without any  $g_{NaR}$  (**a**), with added white noise  
351 input (**b**), and with subsequent addition of  $g_{NaR}$  (**c**). Expanded regions in (**a-c**) show membrane voltage  
352 sub-threshold oscillations (STO) during an inter-burst interval. Also overlaid is the evolution of the slow  
353 sodium inactivation/recovery variable; Arrow indicates recovery during IBI, and magenta circle marks an  
354 arbitrary time point used to track these trajectories in (**d - f**). **d - f** Bifurcation diagrams with projected  
355 trajectories of  $(h_p, V)$ , shown in magenta to highlight the effect of addition of noise near sub-threshold  
356 voltages (**e**) and then the enlarged region of noise tolerance (highlighted green shaded region) due to  
357 addition of  $g_{NaR}$  in (**f**). The magenta circle marks the beginning time points of each trajectory.

358 **Figure 8. Resurgent  $\text{Na}^+$  current reduces entropy in neural discharge. a - b)** Schematic showing

359 introduction of random noise input along with a depolarizing step current to disrupt rhythmic bursting in  
360 the model neuron and during dynamic-clamp experiments (**b**); In (**a**),  $I_{stim}$  is the sum of the constant step  
361 input and random white noise, and in (**b**),  $I_{dyn}$  is the sum of step, random noise and  $I_{NaR}$ . **c - d**) Raster  
362 plots showing patterns of inter-event intervals (IEIs) for the different conditions shown in the model (**e**),  
363 and during real-time dynamic-clamp (**f**). **e - f**) Time series of  $\text{Log}_{10}(\text{IEI})$  for the different conditions shown  
364 in the model (**e**), and during real-time dynamic-clamp (**f**). **g - h**) Shannon entropy (H) and coefficient of  
365 variability (CV) measured for IEIs under the different conditions presented in (**c**) and (**d**). Plotted circles  
366 for the model represent an average across 10 trials, while individual trials are presented for the data points  
367 from two cells. In both (**g**) and (**h**), C: control, N: after addition of random noise, 1X and 2X are  
368 supplements in  $g_{NaR}$  values.

369 **Figure 9. A consolidated role for  $\text{Na}^+$  currents in information processing. a)** A sinusoidal ZAP current

370 input of increasing frequencies from 1 – 250 Hz over 10 sec. **b)** Sub-threshold voltage response showing  
371 resonant behavior that is enhanced by increasing  $g_{NaP}$  (blue traces). **c)** Upper trace: membrane resonance  
372 in the presence of ambient noise that can increase the likelihood of near-threshold behavior (arrows  
373 indicate noise-induced heightened response); Lower trace: presence of noise increases uncertainty in  
374 neural discharge **d)** Noise tolerance due to  $g_{NaR}$  returns order of bursts.

## 375 **Supplementary Information**

376 **4** Supplementary figures and legends

377 **1** Table

378 **1** piece of Supplementary information providing the *Model analyses using dynamical systems methods*

379 **2** pieces of Supplementary information providing the *Model code as MATLAB scripts*

380 **3** pieces of Supplementary information providing the *Dynamic-clamp C++ code*

381

## 382 **Acknowledgements**

383 Grant support include NIH/NINDS NS095157 (SV); NIH/NINDS NS07134 and UCLA Faculty Research  
384 Grant (SHC); NSF DMS1410935 (DHT); NIH/NHLBI 1R01HL134346 (RO); The David Vickter, The

385 Toeffler Family & Simon-Strauss Foundations (MWP). We are grateful to Dr. Bruce Bean, Dr.  
386 Christopher Del Negro and Dr. Alan Garfinkel for helpful comments on an earlier version of the  
387 manuscript.

388

## 389 **Online Methods**

### 390 *Neuron model for bursting activity*

391 The conductance-based Mes V neuron model that we use to investigate the physiological role for  
392  $I_{NaR}$  and  $I_{NaP}$  components of  $I_{Na}$  in burst discharge, incorporates a minimal set of key ionic conductances  
393 essential for producing rhythmic bursting and for maintaining cellular excitability in these neurons <sup>7</sup>.  
394 These include: 1) a potassium leak current,  $I_{leak}$ , 2) sodium current,  $I_{Na}$  as described above, and, 3) a 4-  
395 AP sensitive delayed-rectifier type potassium current ( $I_K$ ) <sup>7, 31</sup>. The model equations follow a  
396 conductance-based Hodgkin-Huxley formalism <sup>12</sup> and are as follows.

$$397 \quad V' = (-I_{Na} - I_K - I_{leak} + I_{app})/C$$

$$398 \quad h'_t = \frac{ht_\infty(V) - h_t}{\tau_t}$$

$$399 \quad h'_p = \frac{hp_\infty(V) - h_p}{\tau_p(V)}$$

$$400 \quad b'_r = \alpha_b(1 - b_r)br_\infty(V) - k_b\beta_{br}(V)b_r$$

$$401 \quad h'_r = \alpha_{hr}(V)hr_\infty(V) - 0.8\beta_{hr}(V)h_r$$

$$402 \quad n' = \frac{n_\infty(V) - n}{\tau_n}$$

403 In what follows, we provide the formulation for each of the ionic currents and describe in detail, the novel  
404  $I_{NaR}$  model.

#### 405 *A. Voltage-gated sodium currents*

406 *In vitro* action potential clamp studies in normal mouse Mes V neurons, and voltage-clamp studies in  
407 Nav1.6 subunit SCN8a knockout mice have demonstrated existence of three functional forms of the total

408 sodium current,  $I_{Na}$ , including the transient ( $I_{NaT}$ ), persistent ( $I_{NaP}$ ) and resurgent ( $I_{NaR}$ ) components<sup>10</sup>,  
409<sup>13</sup>. Each of these currents are critical for Mes V electrogenesis including burst discharge, however, their  
410 exclusive role is yet unclear. Lack of suitable experimental model or manipulation to isolate each of these  
411 TTX-sensitive components, led us to pursue an alternative approach involving computational model  
412 development of the physiological  $I_{Na}$ . To further allow model-based experimental manipulation of  
413 individual components of the  $I_{Na}$ , we designed a conductance-based model as follows. To satisfy a single  
414 channel mediating all the three components, the equation for the total sodium current can be written as:

$$415 \quad I_{Na} = I_{NaT} + I_{NaR} + I_{NaP}$$

416 where,

$$417 \quad I_{NaT} = g_{NaT}(m_{t\infty}(V)h_t)(V - E_{Na})$$

$$418 \quad I_{NaR} = g_{NaR}((1 - b_r)^3 h_r^5)(V - E_{Na})$$

$$419 \quad I_{NaP} = g_{NaP}(m_{p\infty}(V)h_p)(V - E_{Na})$$

420 The maximal persistent conductance,  $g_{NaP}$  was set 5-10% of the transient  $g_{NaT}$ <sup>32</sup> and the resurgent  
421 was set to 15-30% of  $g_{NaT}$ , based on the relative percentage of maximum  $I_{NaR}$  and  $I_{NaT}$  as revealed by  
422 voltage-clamp experiments (e.g., **Fig. 3**);  $E_{Na}$  is the  $Na^+$  reversal potential.

423 Based on experimental data, the gating function/variable,  $m_{t\infty}(V)$ , and  $h_t$ , for  $I_{NaT}$ , and,  $m_{p\infty}(V)$ ,  
424 and,  $h_p$ , for  $I_{NaP}$  are modeled as described in<sup>7</sup>. The rate equations for the inactivation gating variables  $h_t$ ,  
425 and,  $h_p$ , model the fast and slow inactivation of the transient and persistent components respectively. The  
426 activation gates are steady-state voltage-dependent functions, consistent with fast voltage-dependent  
427 activation of  $I_{Na}$ .

428 Steady-state voltage-dependent activation and inactivation functions of *transient* sodium current  
429 respectively include:



430 
$$mt_{\infty}(V) = \frac{1}{1+e^{(-(V+35)/4.3)}}; \quad ht_{\infty}(V) = \frac{1}{1+e^{((V+55)/7.1)}}$$

431 Steady-state activation, inactivation and steady-state voltage-dependent time constant of inactivation for  
432 *persistent* sodium current respectively include:

433 
$$mp_{\infty}(V) = \frac{1}{1+e^{(-(V+50)/6.4)}}; \quad hp_{\infty}(V) = \frac{1}{1+e^{((V+52)/14)}}; \quad \tau_p(V) = 100 + \frac{10000}{1+e^{((V+60)/10)}}$$

434 The novel  $I_{NaR}$  formulation encapsulates the block/unblock mechanism using a block/unblock  
435 variable ( $b_r$ ), and, a second hypothetical variable for a competing inactivation, which we call,  $h_r$ . We call  
436 this a *hybrid* model, to highlight the fact that the model implicitly incorporates the history or state-  
437 dependent eccentric sodium resurgence, following a transient channel opening, and combines this into a  
438 traditional Hodgkin-Huxley type conductance-based formulation. In the  $b_r'$  and  $h_r'$  rate equations for  $b_r$ ,  
439 and,  $h_r$ , the block/unblock variable,  $b_r$  increases or grows according to the term,  $\alpha_b(1 - b_r)br_{\infty}(V)$ , and  
440 decays as per the term,  $k_b\beta_{br}(V)b_r$ , described as follows:

441  $\alpha_b(1 - b_r)br_{\infty}(V)$ : In this growth term, we incorporate state-dependent increase in  $b_r$ , as follows; we  
442 assume that the rate of increase in  $b_r$  is proportional to the probability of channels currently being in the  
443 open state, with a rate constant,  $\alpha_b$  which we call ‘rate of unblocking’; such probability is a function of  
444 the membrane voltage given by,  $br_{\infty}(V)$ , defined as below:

445 
$$br_{\infty}(V) = \frac{1}{1 + e^{((V+40)/12)}}$$

446 The term  $(1 - br_{\infty}(V))$ , models the steady-state voltage-dependency guiding the unblocking  
447 process. The channels being in open state is represented by the term,  $(1 - b_r)$ . Note that if  $(1 - b_r)$  is  
448 close to 1, this means that larger proportion of channels are in an open state, and therefore  $b_r$  grows faster,  
449 promoting blocking. We modeled  $br_{\infty}(V)$  as a decreasing sigmoid function, such that, at negative

450 membrane potentials, channels have a high probability to enter future depolarized states and therefore,  
451  $(1 - b_r) \sim 0$ , in turn,  $b_r$  does not grow fast.

452  $k_b \beta_{br}(V) b_r$ : In this decay term, we assume that the rate of decay of  $b_r$ , is proportional to the probability  
453 of channels being in the blocked state, with a constant of proportionality  $k_b$ , and, this probability is given  
454 by a voltage-dependent function,  $\beta_{br}(V)$ , defined as below:

$$455 \quad \beta_{br}(V) = \frac{2}{1 + e^{(-(V-40)/8)}}$$

456 Note that,  $\beta_{br}(V)$  gives a high probability at depolarized potentials, indicating a blocked state and enables  
457 decrease in  $b_r$  in subsequent time steps.

458 Taken together,  $b_r$ , represents a mechanistic implementation of a block/unblock process by a blocking  
459 particle (see schematic of channel gating in **Fig. 3a**). Additionally, a hypothetical competing inactivation  
460 variable,  $h_r$ , sculpts the voltage-dependent rise and decay times and peak amplitude of sodium resurgence  
461 at -40 mV following a brief depolarization (i.e., transient activation), as observed in voltage-clamp  
462 experiments (see **Fig. 3b**). The functions,  $\alpha_{hr}(V)$ ,  $\beta_{hr}(V)$  and  $hr_{\infty}(V)$  are defined as voltage-dependent  
463 rate equations that guide the voltage-dependent kinetics and activation/inactivation of the  $I_{NaR}$  component  
464 as given below.

465 The steady-state voltage-dependency of the competing inactivation necessary to generate a *resurgent*  $\text{Na}^+$   
466 current is defined as follows:

$$467 \quad hr_{\infty}(V) = \frac{1}{1 + e^{((V+40)/20)}}$$

468 The voltage-dependent rate functions of such inactivation is defined by two functions as follows:

$$469 \quad \alpha_{hr}(V) = \frac{1}{1 + e^{(-(V+45)/11)}}; \quad \beta_{hr}(V) = \frac{0.5}{1 + e^{(-(V+40)/15)}}$$

470 The steepness of the voltage-dependent sigmoid functions for activation and inactivation were tuned  
471 to obtain the experimentally observed  $I_{NaR}$  activation (see **Fig. 3**; also see <sup>10, 13, 16</sup>). To obtain the kinetics  
472 (rise and decay times) of  $I_{NaR}$  comparable to those observed during voltage-clamp experiments (see  
473 **Supplementary Fig. 3**), the model required three units for the blocking variable  $((1 - b_r)^3)$  and five units  
474 for the inactivation variable ( $h_r^5$ ) (see  $I_{NaR}$  equation). Together, the modeled  $I_{Na}$  reproduced the key  
475 contingencies of the Nav1.6 sodium currents (see **Supplementary Fig. 2**) <sup>11, 15, 16</sup>.

476 Sensitivity analyses was conducted for the key parameters of  $I_{NaR}$  gating including  $\alpha_b$ , and,  $k_b$ . Note  
477 that these two parameters control the rate of blocking. As expected, increasing  $\alpha_b$ , that controls rate of  
478 increase in  $b_r$ , decreased the peak amplitude of  $I_{NaR}$ , similar to an experimental increase in block efficacy  
479 by a  $\beta$ -peptide (e.g., <sup>14</sup>). On the other hand,  $k_b$  also moderates  $b_r$ , and increasing  $k_b$ , enhances  $b_r$  decay  
480 rate, that significantly enhanced  $I_{NaR}$ , and, therefore burst duration (not shown). Large increases in  $k_b$   
481 significantly enhanced  $I_{NaR}$ , and indeed transformed bursting to high frequency tonic spiking. However,  
482 the effects of  $I_{NaR}$  on bursting described in the results section were robust for a wide range of values of  
483 these parameters (>100% increase from default values), and, for our simulations, the range of values,  $\alpha_b =$   
484 0.08 to 0.1,  $k_b = 0.8$  to 1.2, were used to reproduce Mes V neuron discharge properties. To reproduce  
485 experimentally observed spike width, we additionally tuned the inactivation time constant,  $\tau_t = 1.5 \pm$   
486 0.5, for  $I_{NaT}$ .

#### 487 **B. Potassium and leak currents**

488 The 4-AP sensitive delayed-rectifier type potassium current,  $I_K$ , and the leak current,  $I_{leak}$  were  
489 modeled similar to <sup>7</sup> as below; also see <sup>31</sup>.

$$490 \quad I_K = g_K n(V - E_K)$$

$$491 \quad I_{leak} = g_{leak}(V - E_{leak})$$

492 where, the steady-state voltage-dependent activation function for the gating variable,  $n$  is given as:

493 
$$n_{\infty}(V) = \frac{1}{1 + e^{(-(V-43)/3.9)}}$$

494  $E_K$  and  $E_{leak}$  are  $K^+$  and leak reversal potentials respectively. Model parameter values used are provided  
495 in **Table 1**.

### 496 ***Brain slice preparation***

497 All animal experiments were performed in accordance to the institutional guidelines and regulations  
498 using protocols approved by Animal Research Committee at UCLA. Experiments were performed in P8-  
499 P14 wild-type mice of either sex. Mice were anesthetized by inhalation of isoflurane and then  
500 decapitated. The brainstem was extracted and immersed in ice-cold cutting solution. The brain-cutting  
501 solution used during slice preparation was composed of the following (in mM): 194 Sucrose, 30 NaCl, 4.5  
502 KCl, 1.2  $\text{NaH}_2\text{PO}_4$ , 26  $\text{NaHCO}_3$ , 10 glucose, 1  $\text{MgCl}_2$ . The extracted brain block was mounted on a  
503 vibrating slicer (DSK Microslicer, Ted Pella) supported by an agar block. Coronal brainstem sections  
504 consisting of rostro-caudal extent of Mes V nucleus, spanning midbrain and pons were obtained for  
505 subsequent electrophysiological recording.

### 506 ***Voltage-clamp electrophysiology***

507 To obtain direct experimental data to drive  $I_{NaR}$  model development, we performed voltage-clamp  
508 experiments on Mes V neurons and recorded  $\text{Na}^+$  currents by blocking voltage-gated  $\text{K}^+$  and  $\text{Ca}^{2+}$  currents  
509 similar to <sup>10</sup>. The pipette internal solution contained the following composition (in mM): 130 CsF, 9 NaCl,  
510 10 HEPES, 10 EGTA, 1  $\text{MgCl}_2$ , 3  $\text{K}_2\text{-ATP}$ , and 1 Na-GTP. The external recording solution contained the  
511 following composition (in mM): 131 NaCl, 10 HEPES, 3 KCl, 10 glucose, 2  $\text{CaCl}_2$ , 2  $\text{MgCl}_2$ , 10  
512 tetraethylammonium (TEA)-Cl, 10 CsCl, 1 4-aminopyridine (4-AP), and 0.3  $\text{CdCl}_2$ . The voltage-clamp  
513 protocol consisted of a holding potential of -90 mV followed by a brief voltage pulse (3 ms) of +30 mV,

514 to remove voltage-dependent block, followed by voltage steps between -70 mV to -10 mV, in steps of 10  
515 mV for  $\sim 100$  ms to activate  $I_{NaR}$ , and then returned to -90 mV. A 0.5  $\mu$ M TTX abolished the  $Na^+$  current  
516 and the residual leak current was subtracted to isolate evident sodium currents. Recordings with series  
517  $R_{series} > 0.1R_m$  were discarded.

### 518 ***Dynamic-clamp electrophysiology***

519 Real-time dynamic-clamp electrophysiology and *in vitro* current-clamp recording were used for  
520 testing the physiological effects of  $Na^+$  currents on burst discharge as well as noise-mediated entropy  
521 changes corrected by  $I_{NaR}$ <sup>33</sup>. We selected neurons responding with a bursting pattern in response to supra-  
522 threshold step current injection in the Mes V nucleus in brainstem slice preparation for our study; >50%  
523 of neurons showing other patterns (e.g., tonic or single spiking cells) were discarded. Dynamic-clamp was  
524 successfully performed in bursting cells ( $n = 10$ ). For dynamic-clamp recording, slices were placed in  
525 normal ACSF at room temperature (22–25°C). The ACSF recording solution during patch-clamp  
526 recording consisted of the following (in mM): 124 NaCl, 4.5 KCl, 1.2  $NaH_2PO_4$ , 26  $NaHCO_3$ , 10 glucose,  
527 2  $CaCl_2$ , 1  $MgCl_2$ . Cutting and recording solutions were bubbled with carbogen (95%  $O_2$ , 5%  $CO_2$ ) and  
528 maintained at pH between 7.25 – 7.3. The pipette internal solution used in current clamp experiments was  
529 composed of the following (in mM): 135 K-gluconate, 5 KCl, 0.5  $CaCl_2$ , 5 HEPES (base), 5 EGTA, 2 Mg-  
530 ATP, and 0.3 Na-ATP with a pH between 7.28 – 7.3, and osmolarity between  $290 \pm 5$  mOsm. Patch  
531 pipettes (3 – 5  $M\Omega$ ) were pulled using a Brown/Flaming P-97 micro pipette puller (Sutter Instruments).  
532 Slices were perfused with oxygenated recording solution ( $\sim 2$ ml/min) at room temperature while secured  
533 in a glass bottom recording chamber mounted on an inverted microscope with differential interface  
534 contrast optics (Zeiss Axiovert 10). Current clamp (and dynamic-clamp) data were acquired and analyzed  
535 using custom-made software (G-Patch, Analysis) with sampling frequency: 10 kHz; cut-off filter  
536 frequency: 2 kHz.

537 The Linux-based Real-Time eXperimental Interface (RTXI v1.3) was used to implement dynamic-  
538 clamp , running on a modified Linux kernel extended with the Real-Time Applications Interface, which  
539 allows high-frequency, periodic, real-time calculations <sup>34</sup>. The RTXI computer interfaced with the  
540 electrophysiological amplifier (Axon Instruments Axopatch 200A, in current-clamp mode) and the data  
541 acquisition PC, via a National Instruments PCIe-6251 board. Computation frequency was 20 kHz.

542 The model  $I_{NaR}$  current used for real-time dynamic clamping into Mes V neuron *in vitro* was  
543 developed as discussed above. The ionic conductance  $g_{NaR}$  was set to suitable values to introduce model  
544  $I_{NaR}$  current into a Mes V neuron during whole-cell current-clamp recording. For experiments involving  
545 noise modulation, two approaches were used to model random noise generated in RTXI: 1) using a  
546 Wiener-like process with normally distributed random values, 2) normally-distributed random numbers  
547 were generated from uniformly-distributed numbers using the central limit theorem:

548 
$$N(t) = \left( \sum_{i=1}^{12} U_i \right) - 6$$

549 where,  $N(t)$  is a normally-distributed random number with mean,  $\mu = 0$ , and standard deviation,  $\sigma = 1$ ,  
550 each  $U_i$  is a uniformly-distributed random number between 0 - 1 generated using the C++ rand() function.  
551 A current,  $I_{noise}$  was then generated as follows:

552 
$$I_{noise}(t) = I_{noise}(t - 1) + N(t) \cdot \sqrt{\Delta_t} \cdot A$$

553 where,  $N(t)$  is a uniformly-distributed random number between 0 - 1 generated in C++ at each sampling  
554 time  $t$  and  $\Delta_t$  is the time distance between consecutive computations. In both the above cases,  $A$  is a  
555 scaling factor representing maximal peak-to-peak noise amplitude, modified to adjust noise amplitudes  
556 suitably to produce discernable burst irregularities. Values of  $A$  were set during experimentation and  
557 ranged from 3 - 5 across various cells for the data presented.  $I_{noise}(t)$  was injected as pA current.

558 ***Model simulation and Data analyses***

559 Model simulation and all the analyses were performed using MATLAB (Mathworks™) (see model  
560 code provided as **Supplementary Information**). Model bifurcation analyses were performed using  
561 XPPAUT/AUTO<sup>35</sup>; A variable step Runge-Kutta method ‘ode45’ was used for current-clamp simulations  
562 and ‘ode23s’ was used for voltage-clamp simulations.

563 Inter-event intervals (IEI) between spikes in dynamic-clamp recordings were detected using Clampfit  
564 9.0 software and were classified *post hoc* as ISIs and IBIs based on a bi-modal distribution of IEIs.  
565 Typically, IEI values < 40 ms were considered as ISIs within bursts and IEI values ≥ 40 ms were  
566 considered as IBIs. Any occasional isolated spikes were eliminated from analyses for burst duration  
567 calculations.

568 To calculate Shannon’s entropy<sup>36</sup> in the inter-event intervals (IEIs), we generated histograms of and  
569 calculated the probabilities for each bin of the underlying IEI distributions for each 10 sec spike trains.  
570 The probability of  $k^{th}$  IEI bin from a distribution of  $n$  equal size bins was calculated from the bin counts,  
571  $N(k)$  as:

572 
$$p(k) = \frac{N(k)}{\sum_{k=1}^n N(k)}$$

573 The entropy, H was calculated using the following formula:

574 
$$H = - \sum_{k=1}^n p_k \log_2 p_k$$

575 where,  $n$  is the total number of IEI bins, each with probability,  $p_k$ .

576 The coefficient of variation (CV) in IEIs was calculated as follows:

577 
$$CV = \frac{s}{\bar{x}}$$

578 where,  $s$  is the IEI sample standard deviation, and,  $\bar{x}$  is the sample mean.

## 579 References

- 580 1. Krahe, R. & Gabbiani, F. Burst firing in sensory systems. *Nat Rev Neurosci* **5**, 13-23 (2004).  
581 2. Ermentrout, B.G. & Terman, D.H. Bursting Oscillations. in *Mathematical Foundations of Neuroscience*  
582 103-127 (Springer-Verlag New York, 2010).  
583 3. Del Negro, C.A., Hsiao, C.F., Chandler, S.H. & Garfinkel, A. Evidence for a novel bursting mechanism in  
584 rodent trigeminal neurons. *Biophys J* **75**, 174-182 (1998).  
585 4. Bialek, W., Rieke, F., de Ruyter van Steveninck, R.R. & Warland, D. Reading a neural code. *Science* **252**,  
586 1854-1857 (1991).  
587 5. Catterall, W.A. From ionic currents to molecular mechanisms: the structure and function of voltage-gated  
588 sodium channels. *Neuron* **26**, 13-25 (2000).  
589 6. Alonso, A. & Llinás, R.R. Subthreshold Na<sup>+</sup>-dependent theta-like rhythmicity in stellate cells of entorhinal  
590 cortex layer II. *Nature* **342**, 175-177 (1989).  
591 7. Wu, N., *et al.* Persistent sodium currents in mesencephalic v neurons participate in burst generation and  
592 control of membrane excitability. *J Neurophysiol* **93**, 2710-2722 (2005).  
593 8. Hutcheon, B. & Yarom, Y. Resonance, oscillation and the intrinsic frequency preferences of neurons.  
594 *Trends Neurosci* **23**, 216-222 (2000).  
595 9. Schwandt, P.C. & Crill, W.E. Amplification of synaptic current by persistent sodium conductance in apical  
596 dendrite of neocortical neurons. *J Neurophysiol* **74**, 2220-2224 (1995).  
597 10. Enomoto, A., Han, J.M., Hsiao, C.F., Wu, N. & Chandler, S.H. Participation of sodium currents in burst  
598 generation and control of membrane excitability in mesencephalic trigeminal neurons. *J Neurosci* **26**, 3412-3422  
599 (2006).  
600 11. Raman, I.M. & Bean, B.P. Resurgent sodium current and action potential formation in dissociated  
601 cerebellar Purkinje neurons. *J Neurosci* **17**, 4517-4526 (1997).  
602 12. Hodgkin, A.L. & Huxley, A.F. A quantitative description of membrane current and its application to  
603 conduction and excitation in nerve. *J Physiol* **117**, 500-544 (1952).  
604 13. Enomoto, A., Han, J.M., Hsiao, C.F. & Chandler, S.H. Sodium currents in mesencephalic trigeminal  
605 neurons from Nav1.6 null mice. *J Neurophysiol* **98**, 710-719 (2007).  
606 14. Grieco, T.M., Malhotra, J.D., Chen, C., Isom, L.L. & Raman, I.M. Open-channel block by the cytoplasmic  
607 tail of sodium channel beta4 as a mechanism for resurgent sodium current. *Neuron* **45**, 233-244 (2005).  
608 15. Smith, M.R., Smith, R.D., Plummer, N.W., Meisler, M.H. & Goldin, A.L. Functional analysis of the mouse  
609 Scn8a sodium channel. *J Neurosci* **18**, 6093-6102 (1998).  
610 16. Raman, I.M. & Bean, B.P. Inactivation and recovery of sodium currents in cerebellar Purkinje neurons:  
611 evidence for two mechanisms. *Biophys J* **80**, 729-737 (2001).  
612 17. Khaliq, Z.M., Gouwens, N.W. & Raman, I.M. The contribution of resurgent sodium current to high-  
613 frequency firing in Purkinje neurons: an experimental and modeling study. *J Neurosci* **23**, 4899-4912 (2003).  
614 18. Kim, J.H., Kushmerick, C. & von Gersdorff, H. Presynaptic resurgent Na<sup>+</sup> currents sculpt the action  
615 potential waveform and increase firing reliability at a CNS nerve terminal. *J Neurosci* **30**, 15479-15490 (2010).  
616 19. Birmingham, J.T., Szuts, Z.B., Abbott, L.F. & Marder, E. Encoding of muscle movement on two time scales  
617 by a sensory neuron that switches between spiking and bursting modes. *J Neurophysiol* **82**, 2786-2797 (1999).  
618 20. Zheng, Y. & Escabí, M.A. Proportional spike-timing precision and firing reliability underlie efficient  
619 temporal processing of periodicity and envelope shape cues. *J Neurophysiol* **110**, 587-606 (2013).  
620 21. Reich, D.S., Mechler, F., Purpura, K.P. & Victor, J.D. Interspike intervals, receptive fields, and information  
621 encoding in primary visual cortex. *J Neurosci* **20**, 1964-1974 (2000).  
622 22. Tiesinga, P., Fellous, J.M. & Sejnowski, T.J. Regulation of spike timing in visual cortical circuits. *Nat Rev*  
623 *Neurosci* **9**, 97-107 (2008).  
624 23. Mainen, Z.F. & Sejnowski, T.J. Reliability of spike timing in neocortical neurons. *Science* **268**, 1503-1506  
625 (1995).  
626 24. Raman, I.M., Sprunger, L.K., Meisler, M.H. & Bean, B.P. Altered subthreshold sodium currents and  
627 disrupted firing patterns in Purkinje neurons of Scn8a mutant mice. *Neuron* **19**, 881-891 (1997).



- 628 25. Vilin, Y.Y. & Ruben, P.C. Slow inactivation in voltage-gated sodium channels: molecular substrates and  
629 contributions to channelopathies. *Cell Biochem Biophys* **35**, 171-190 (2001).
- 630 26. Béhuret, S., Deleuze, C. & Bal, T. Corticothalamic Synaptic Noise as a Mechanism for Selective Attention  
631 in Thalamic Neurons. *Front Neural Circuits* **9**, 80 (2015).
- 632 27. Faisal, A.A., Selen, L.P. & Wolpert, D.M. Noise in the nervous system. *Nat Rev Neurosci* **9**, 292-303  
633 (2008).
- 634 28. Izhikevich, E.M., Desai, N.S., Walcott, E.C. & Hoppensteadt, F.C. Bursts as a unit of neural information:  
635 selective communication via resonance. *Trends Neurosci* **26**, 161-167 (2003).
- 636 29. Lisman, J.E. Bursts as a unit of neural information: making unreliable synapses reliable. *Trends Neurosci*  
637 **20**, 38-43 (1997).
- 638 30. Koch, C. & Segev, I. The role of single neurons in information processing. *Nat Neurosci* **3 Suppl**, 1171-  
639 1177 (2000).
- 640 31. Del Negro, C.A. & Chandler, S.H. Physiological and theoretical analysis of K<sup>+</sup> currents controlling  
641 discharge in neonatal rat mesencephalic trigeminal neurons. *J Neurophysiol* **77**, 537-553 (1997).
- 642 32. Taddese, A. & Bean, B.P. Subthreshold sodium current from rapidly inactivating sodium channels drives  
643 spontaneous firing of tuberomammillary neurons. *Neuron* **33**, 587-600 (2002).
- 644 33. Prinz, A.A., Abbott, L.F. & Marder, E. The dynamic clamp comes of age. *Trends Neurosci* **27**, 218-224  
645 (2004).
- 646 34. Lin, R.J., Bettencourt, J., Wha Ite, J., Christini, D.J. & Butera, R.J. Real-time experiment interface for  
647 biological control applications. *Conf Proc IEEE Eng Med Biol Soc* **2010**, 4160-4163 (2010).
- 648 35. Ermentrout, B. XPPAUT5.0 – the differential equations tool. (2001).
- 649 36. Shannon, C.E. & Weaver, W. *The Mathematical Theory of Communication* (University of Illinois Press,  
650 Urbana, 1949).

651

**Fig. 1. Study workflow**

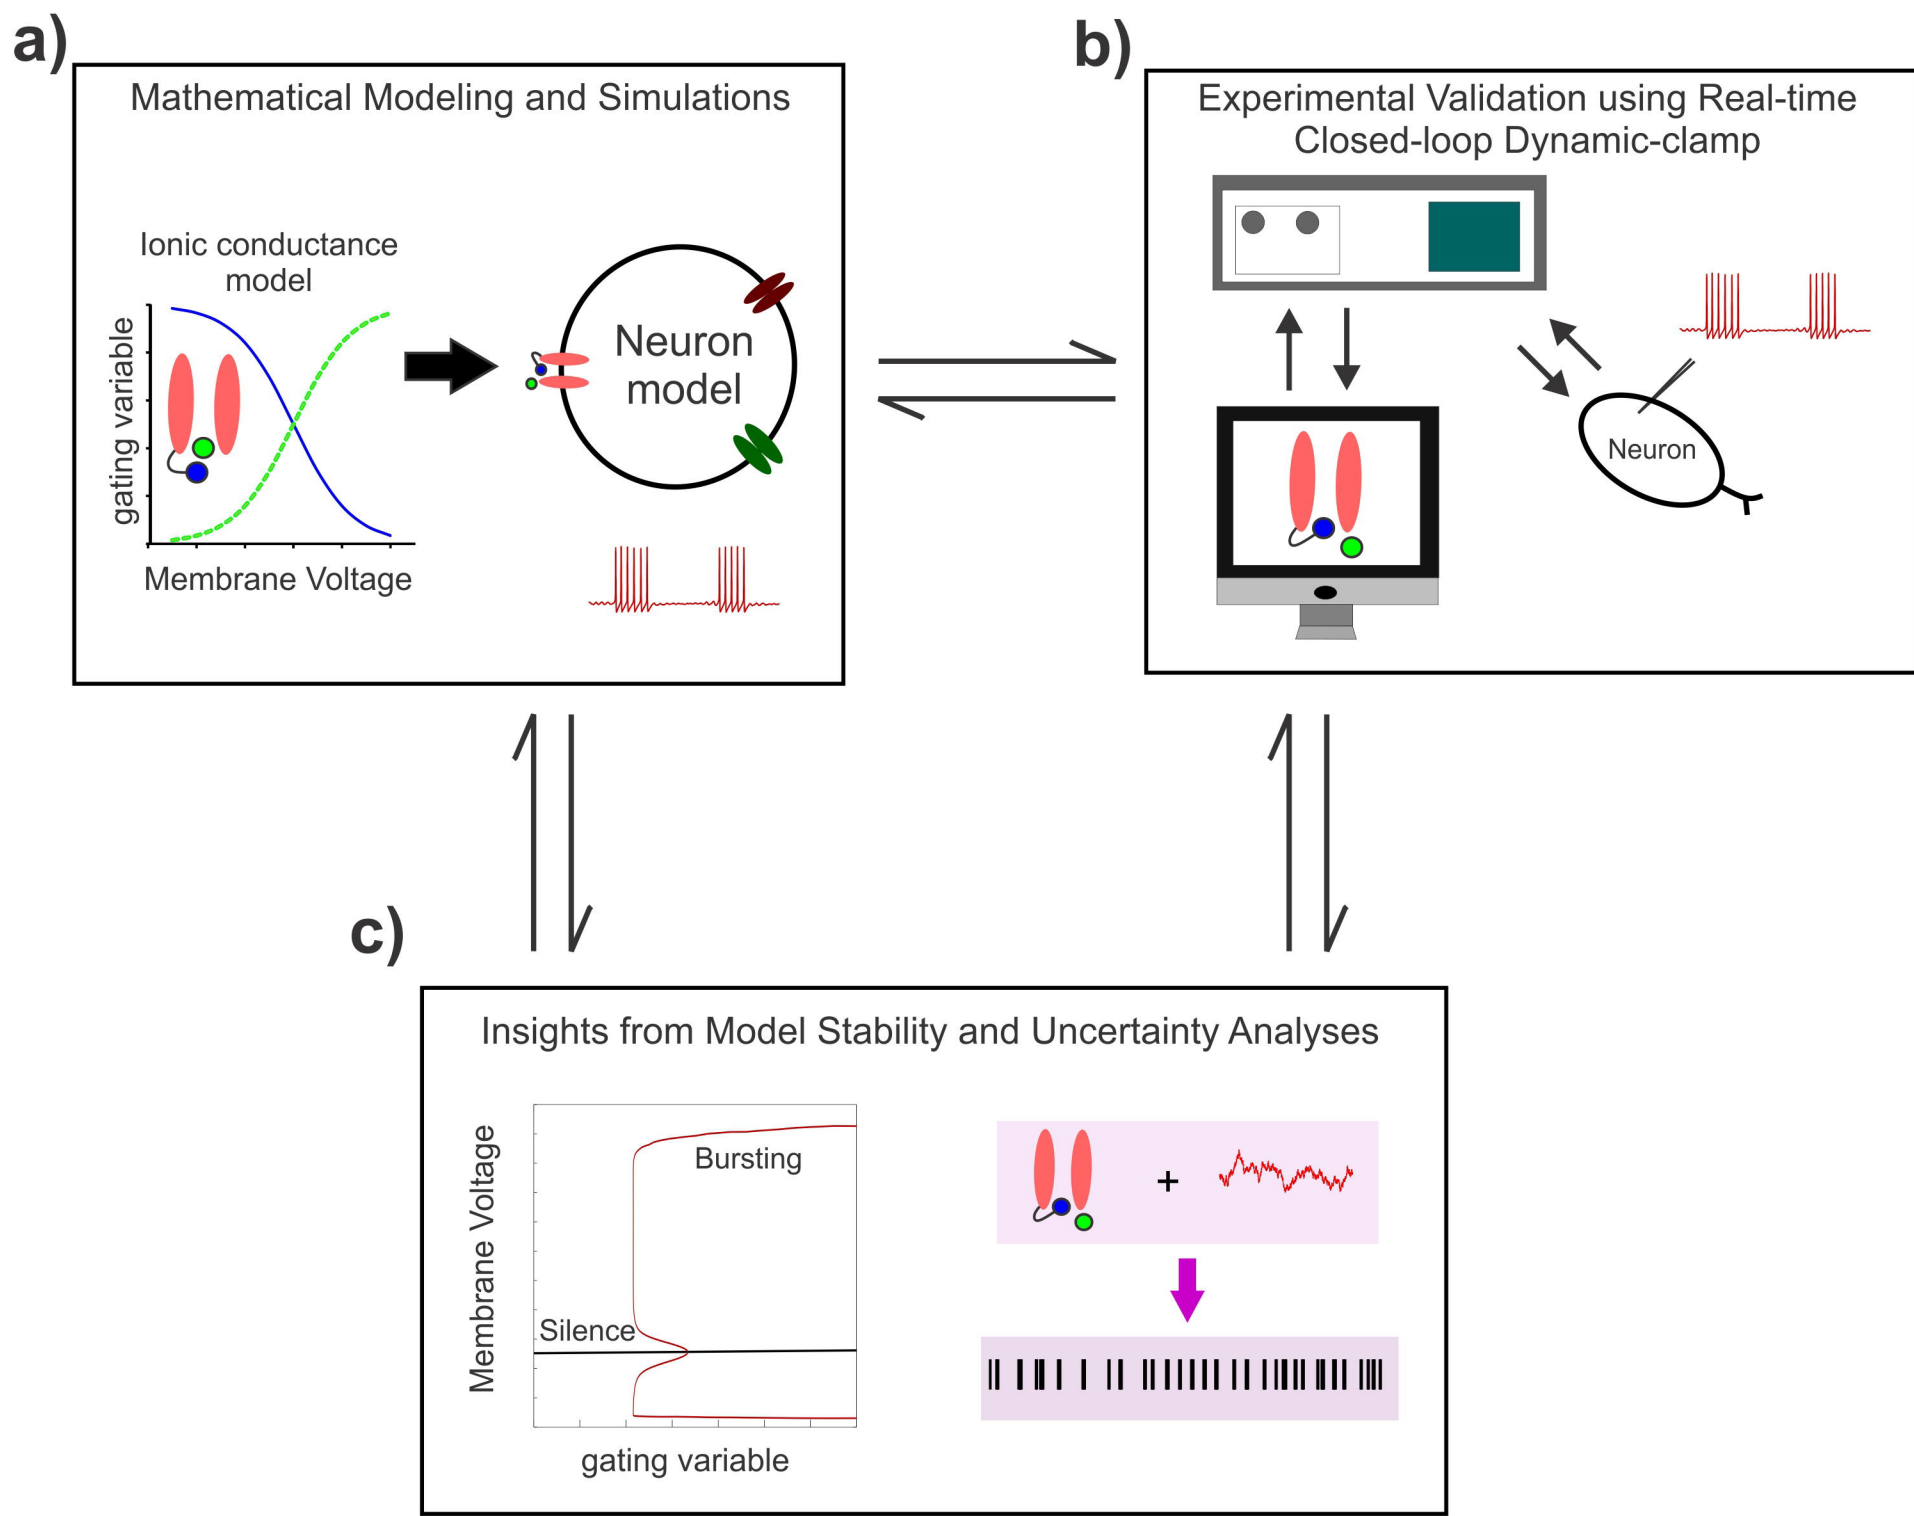

**Fig. 2. Components of  $I_{Na}$**

**a)** A model for Nav1.6 type sodium currents

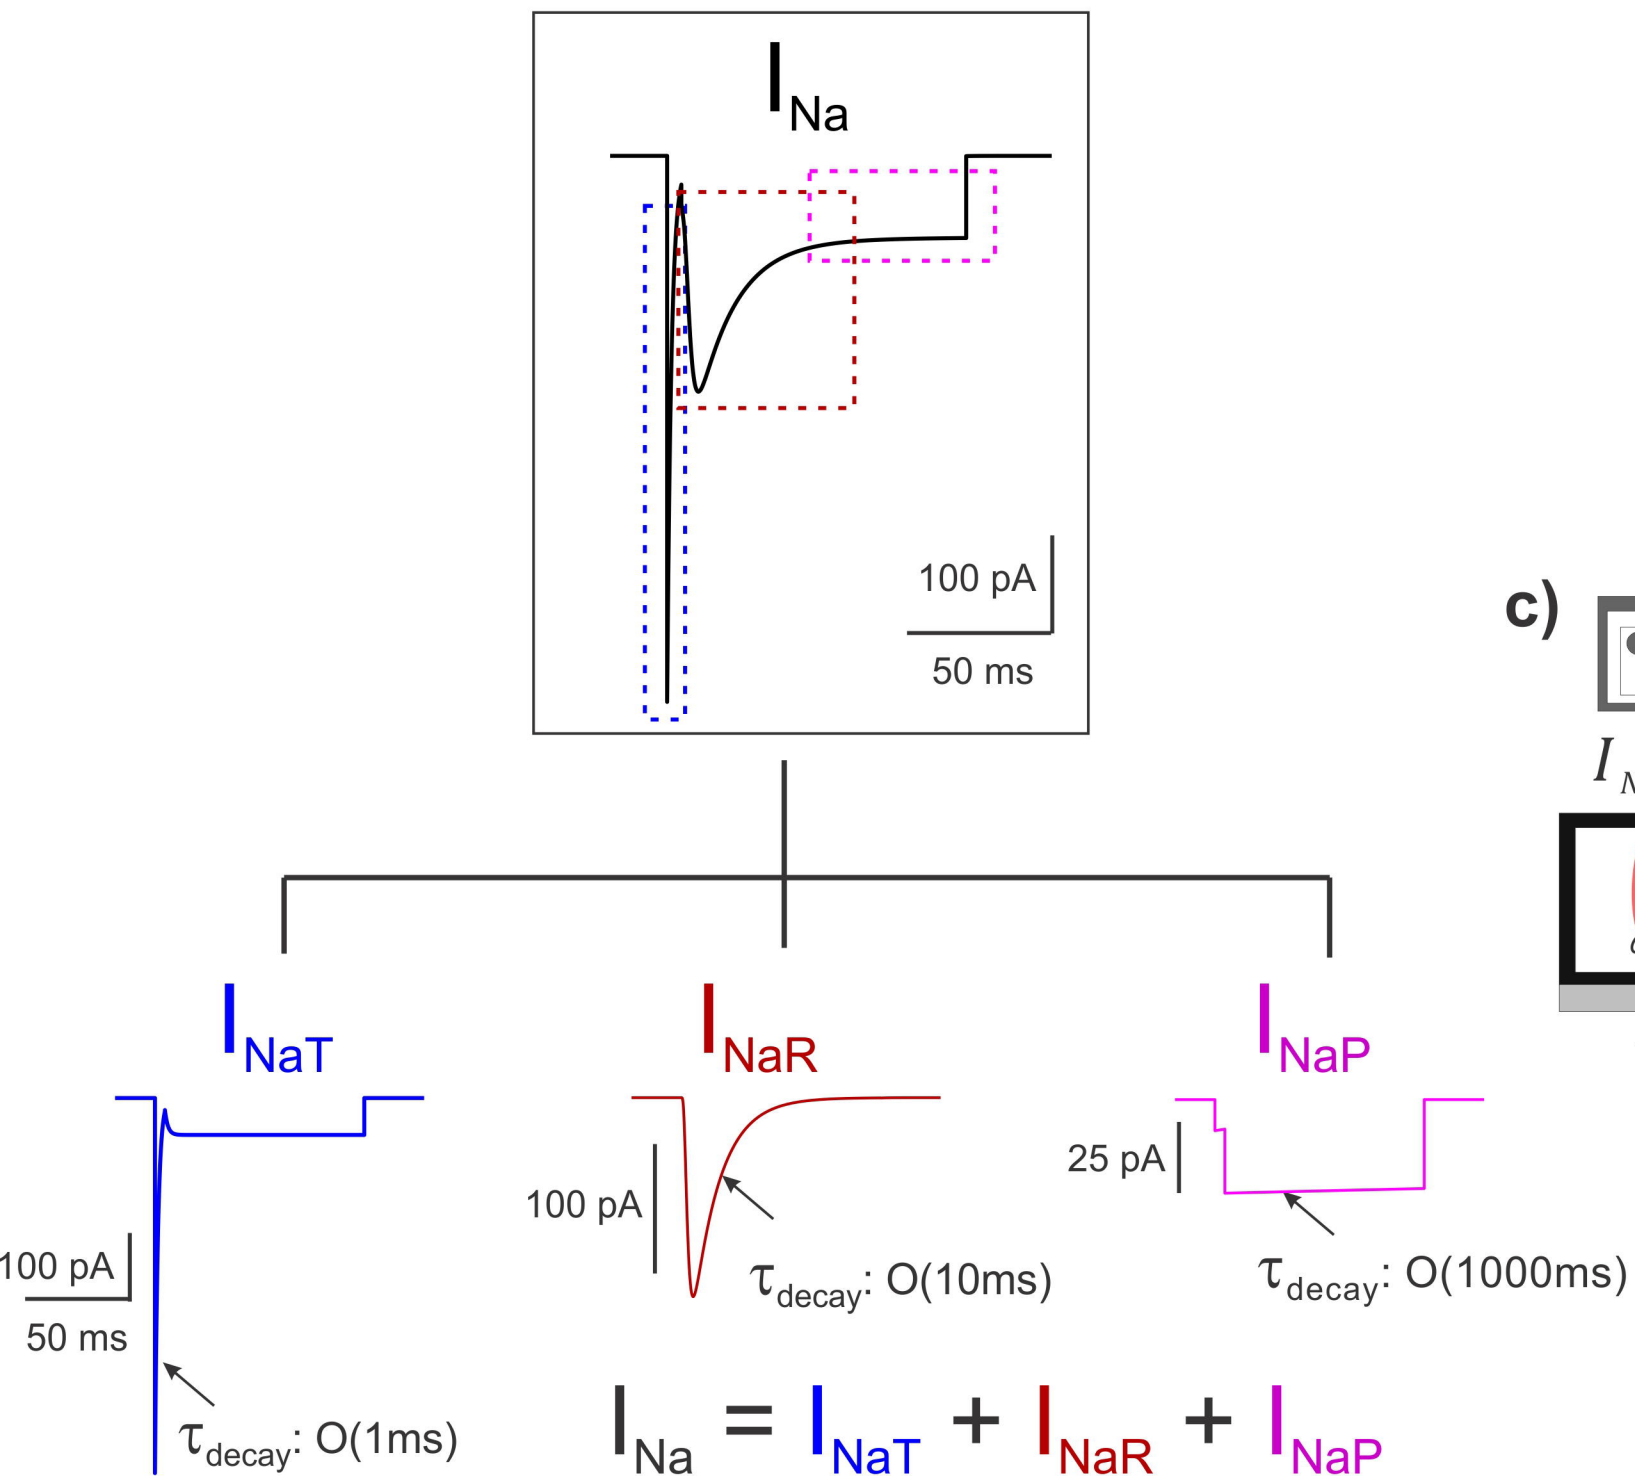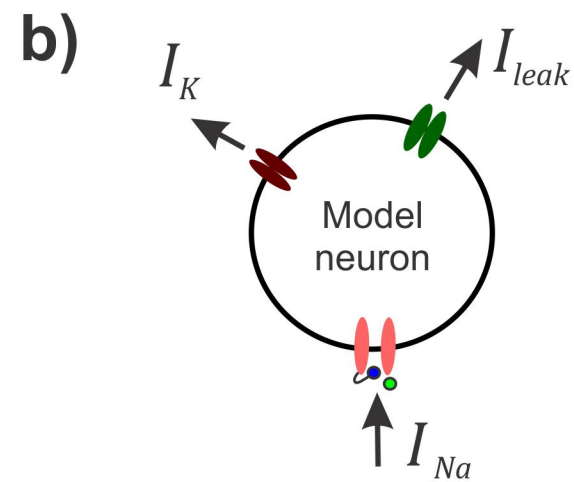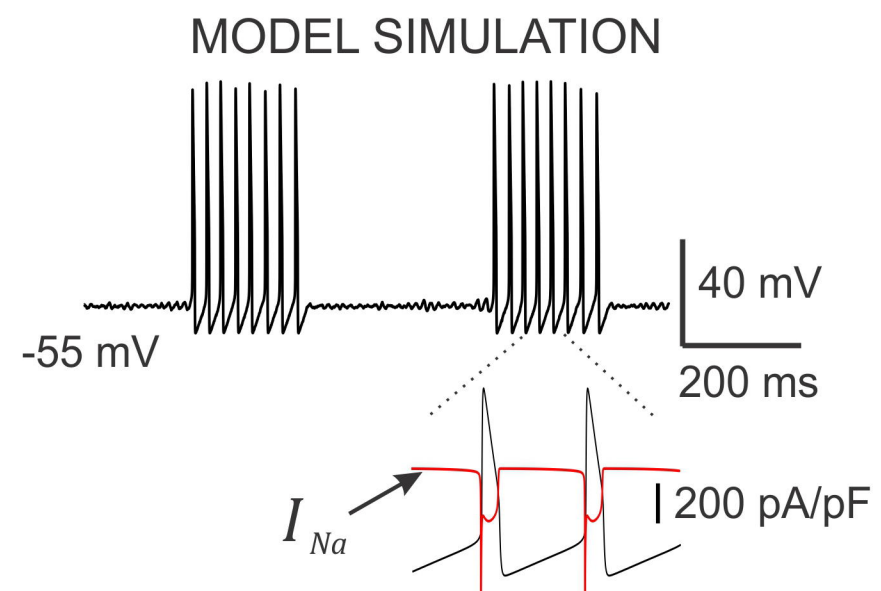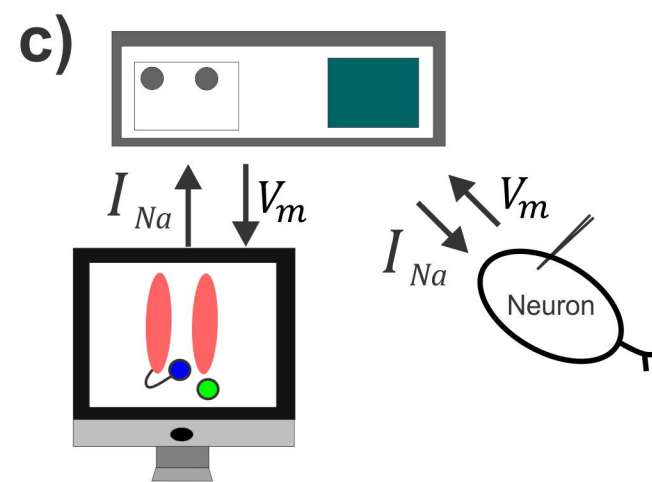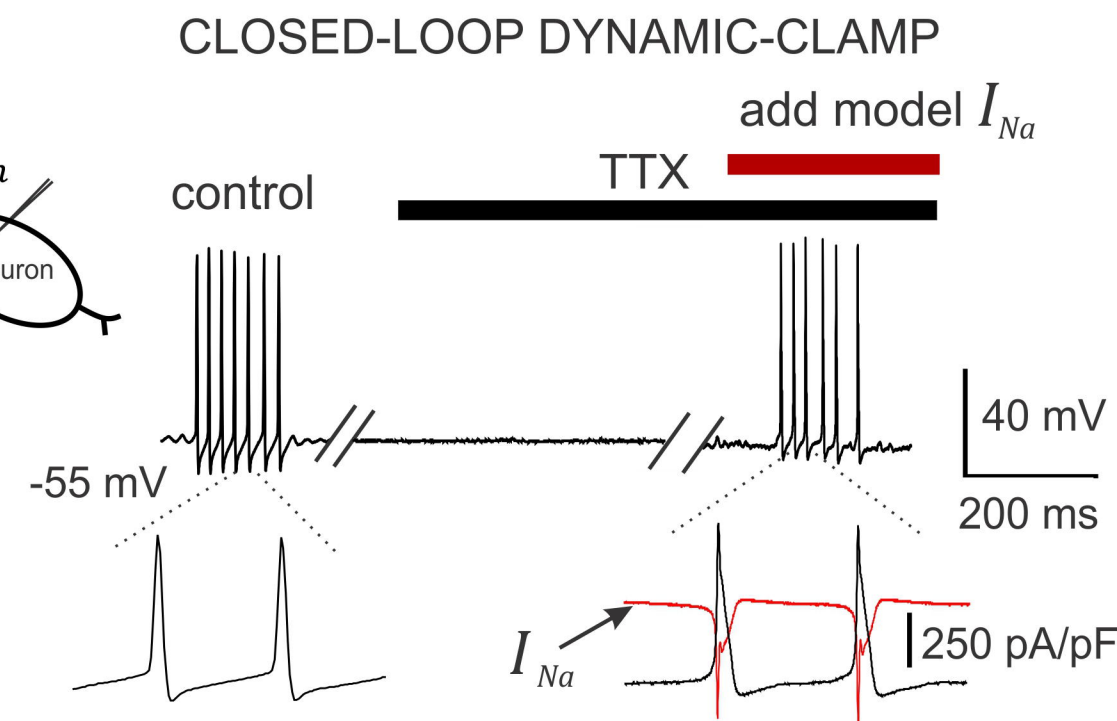

**Fig. 3. A novel mathematical model for  $I_{NaR}$**

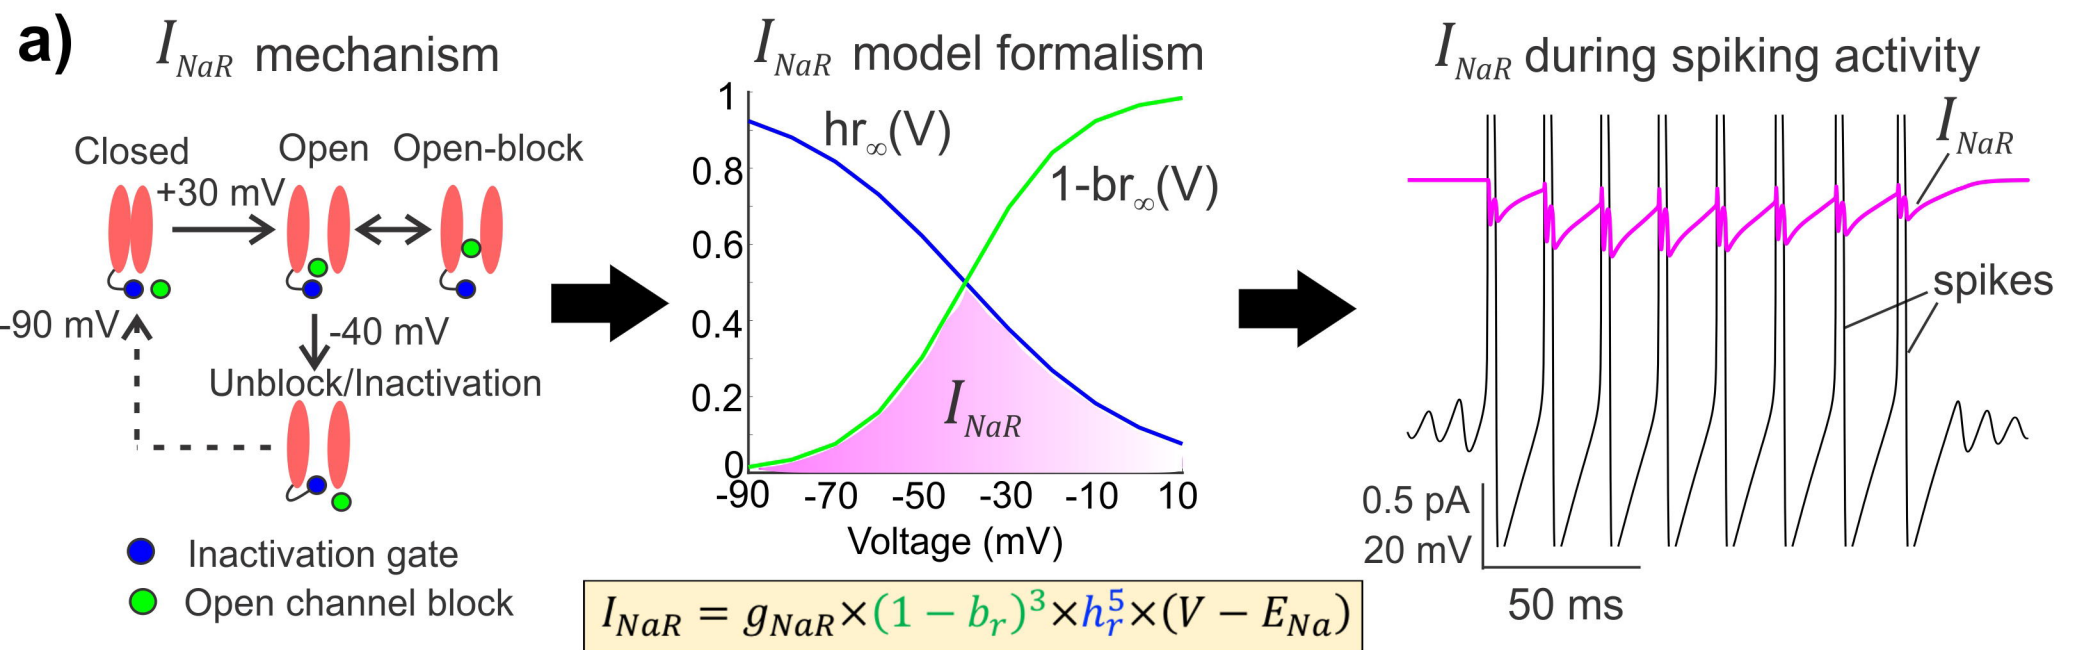

**b)**

**I.**

Simulated  $I_{Na}$

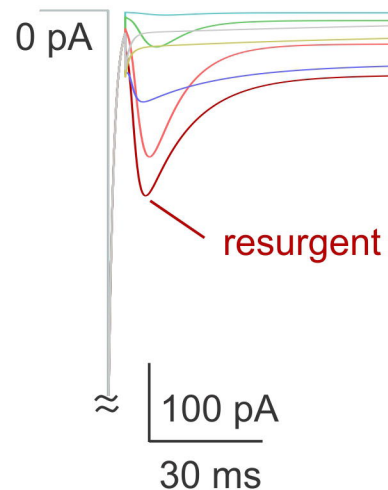

**$I_{NaR}$  experimental validation**

$I_{Na}$  from voltage-clamp recording

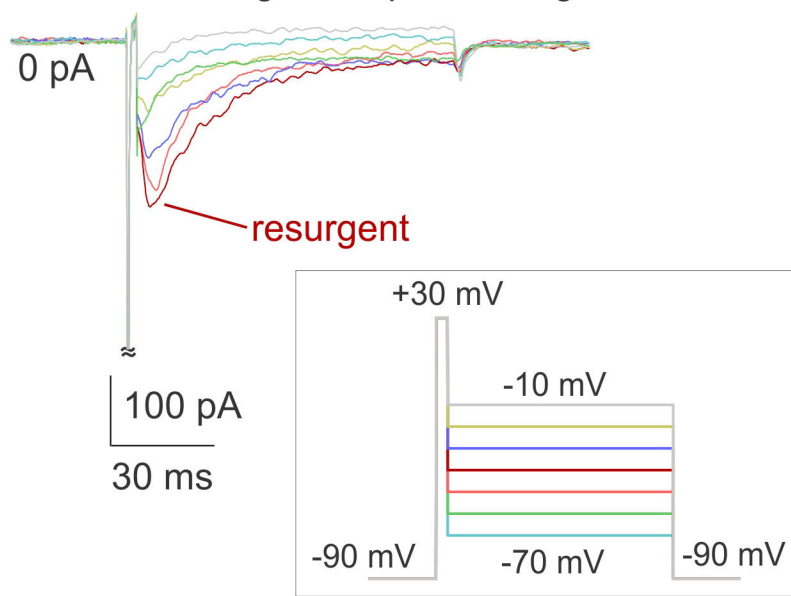

**II.**

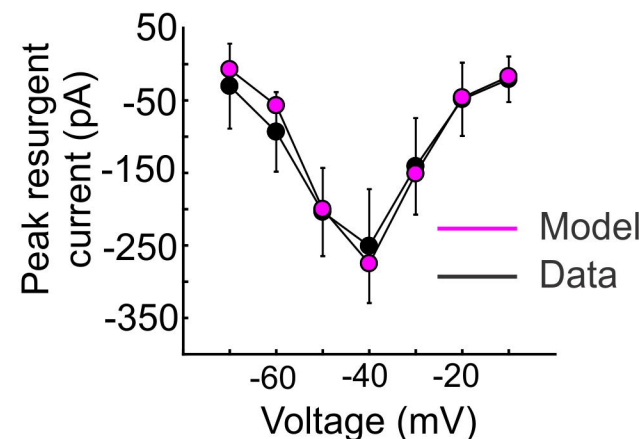

# Fig. 4. $I_{NaR}$ effects on burst discharge

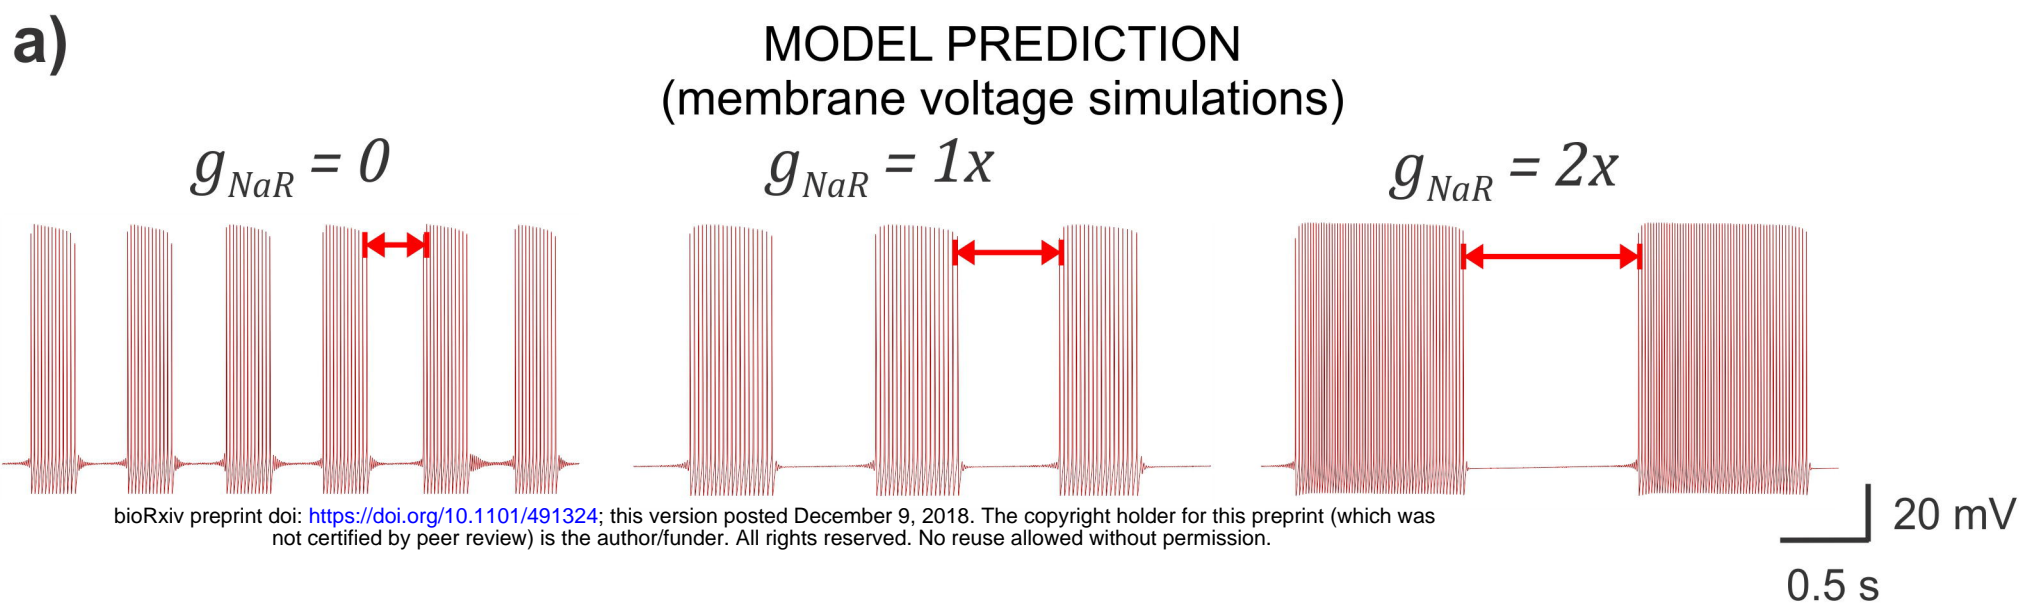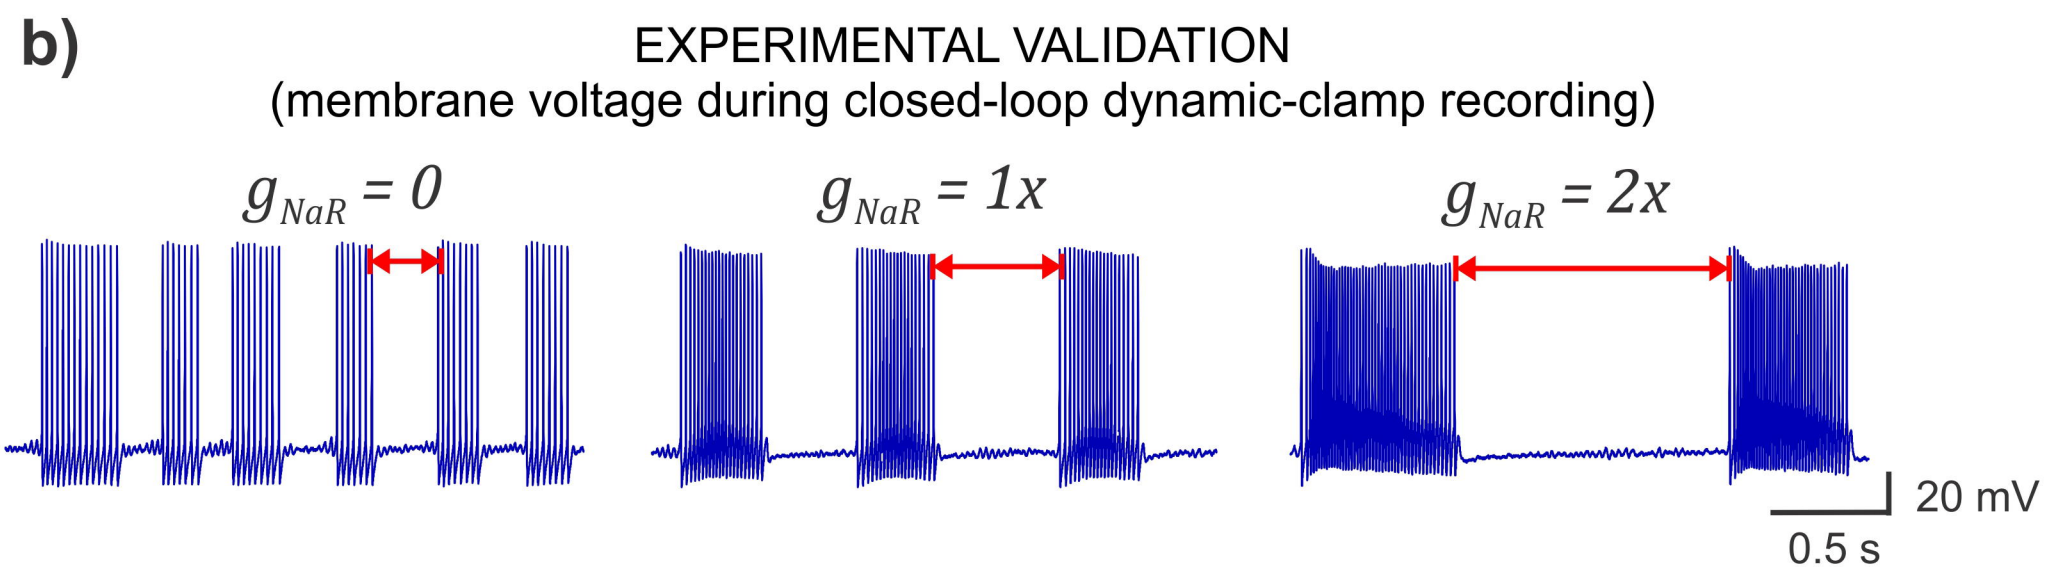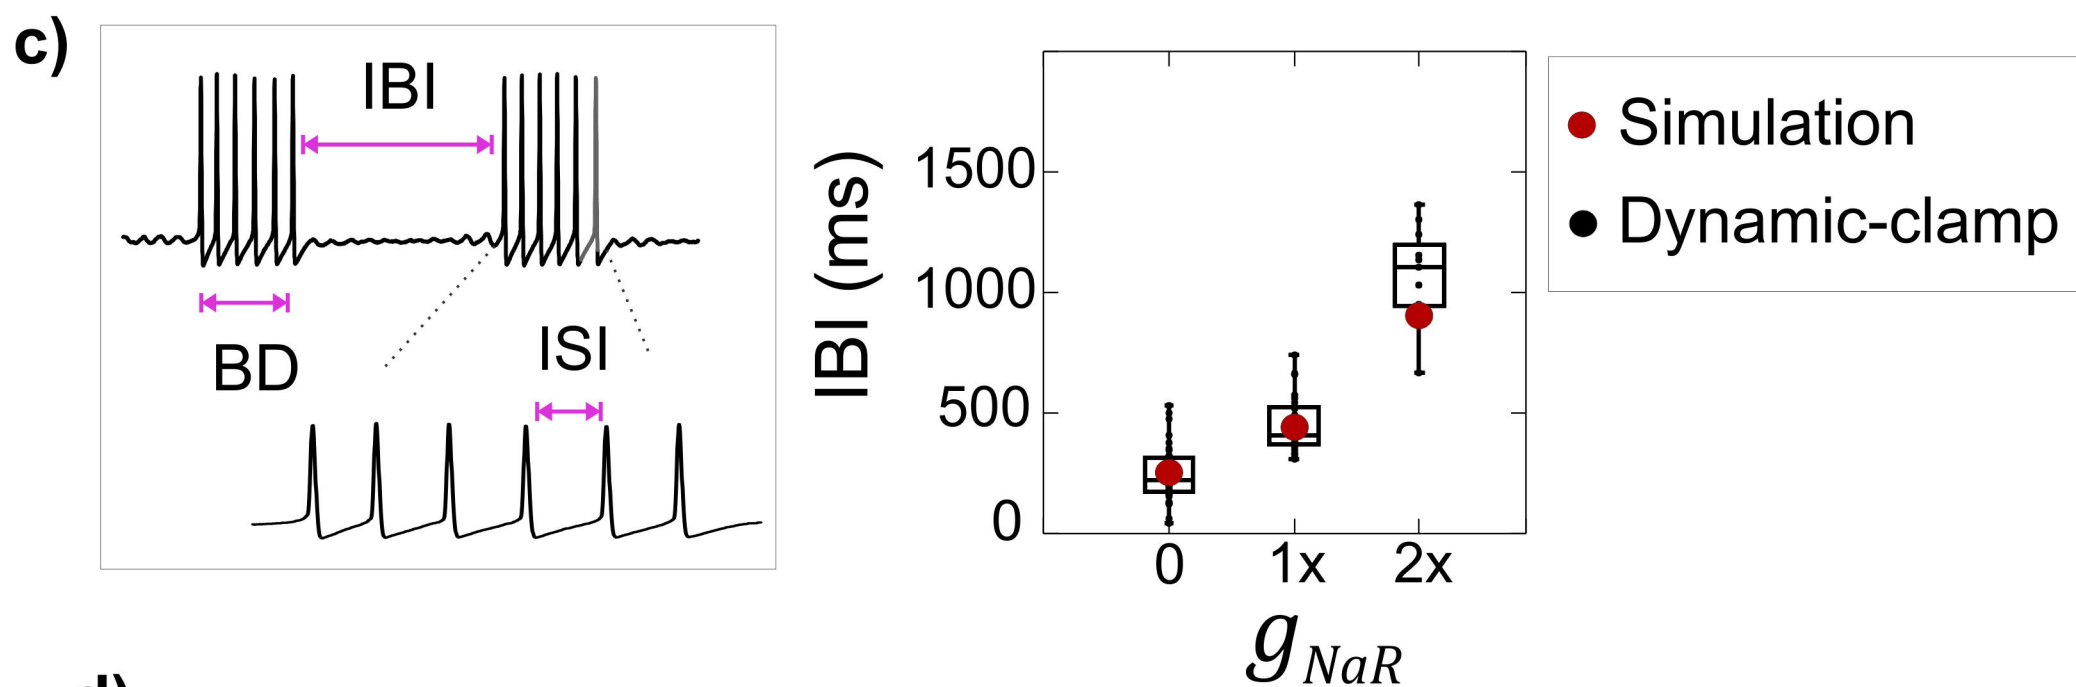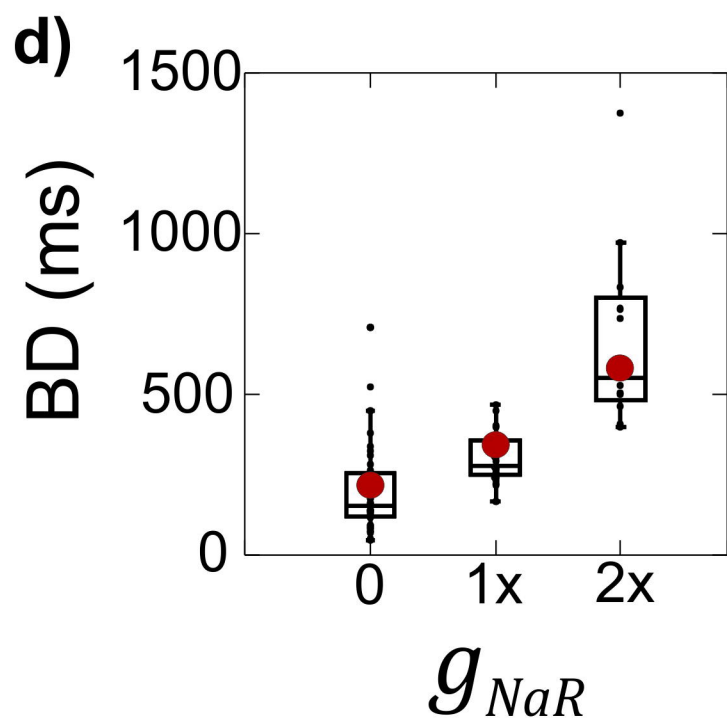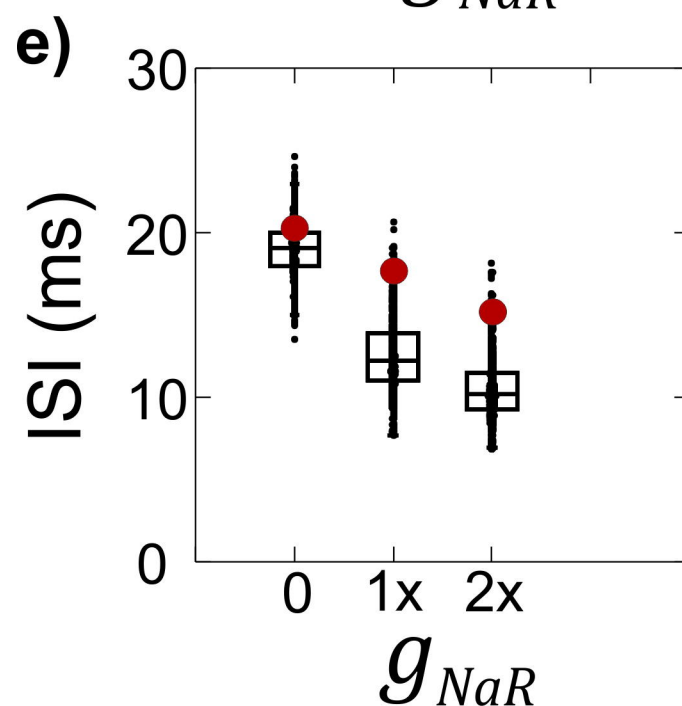

**Fig. 5.  $I_{NaP}$  effects on burst discharge**

**a)**

MODEL PREDICTION  
(membrane voltage simulations)

$g_{NaP} = 0$

$g_{NaP} = 1x$

$g_{NaP} = 1.5x$

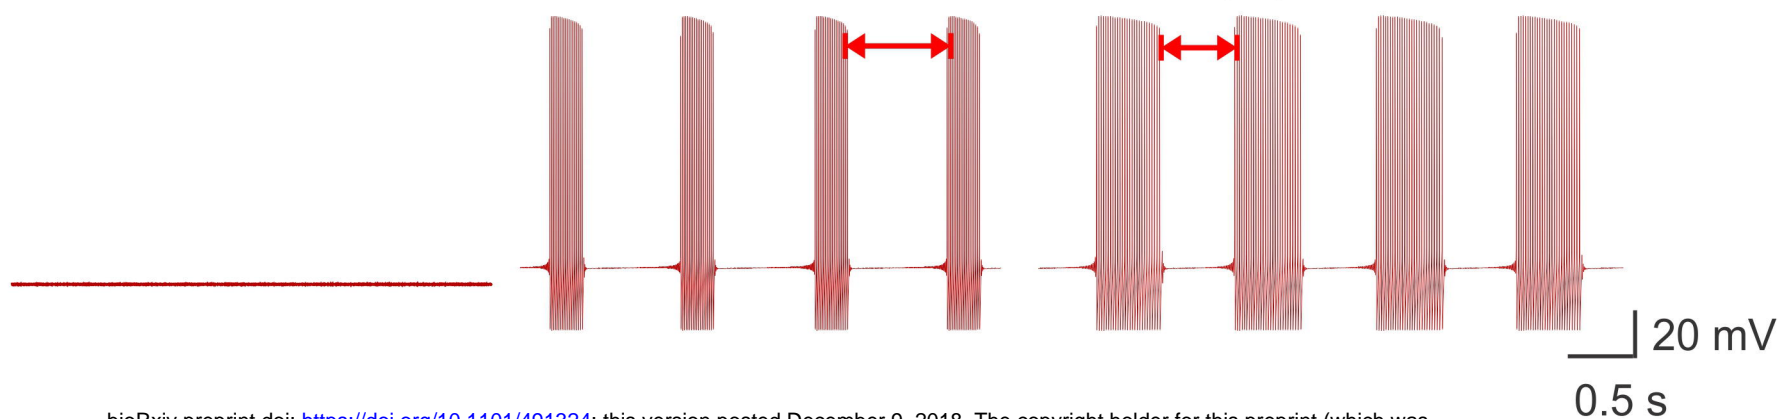

**b)**

EXPERIMENTAL VALIDATION  
(membrane voltage during closed-loop dynamic-clamp recording)

$g_{NaP} = 0$

$g_{NaP} = 1x$

$g_{NaP} = 1.5x$

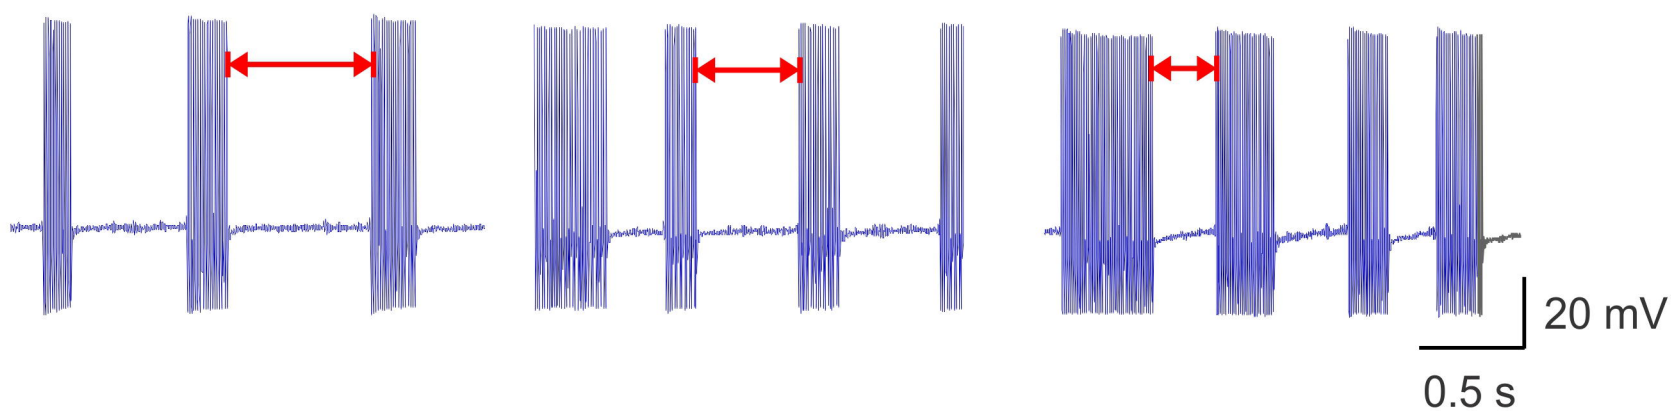

**c)**

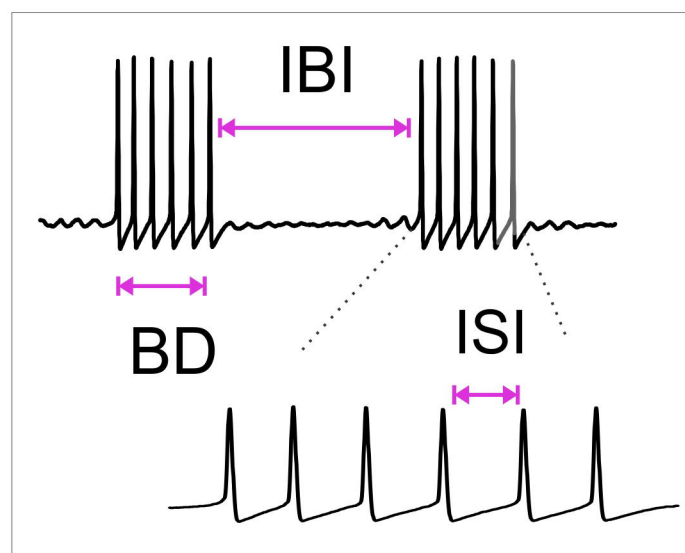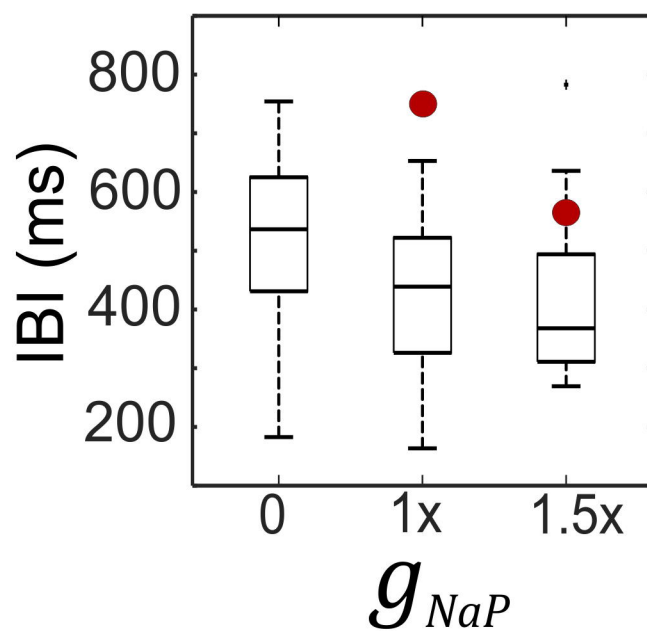

**d)**

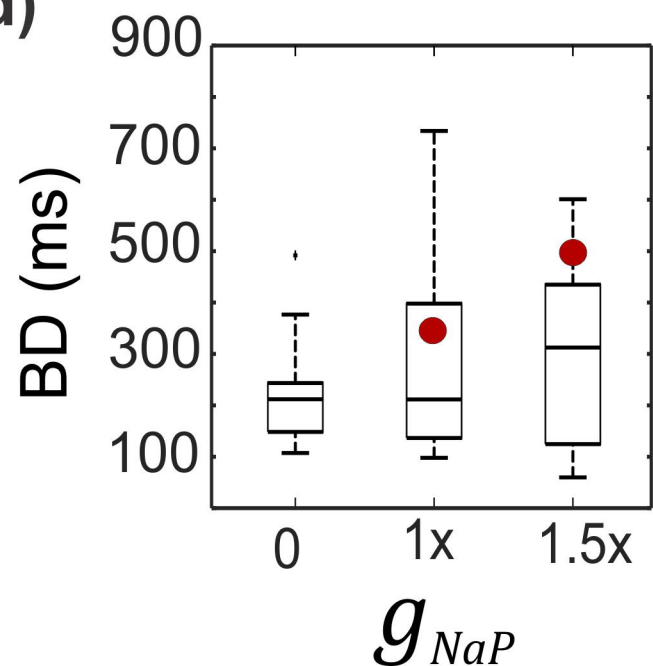

**e)**

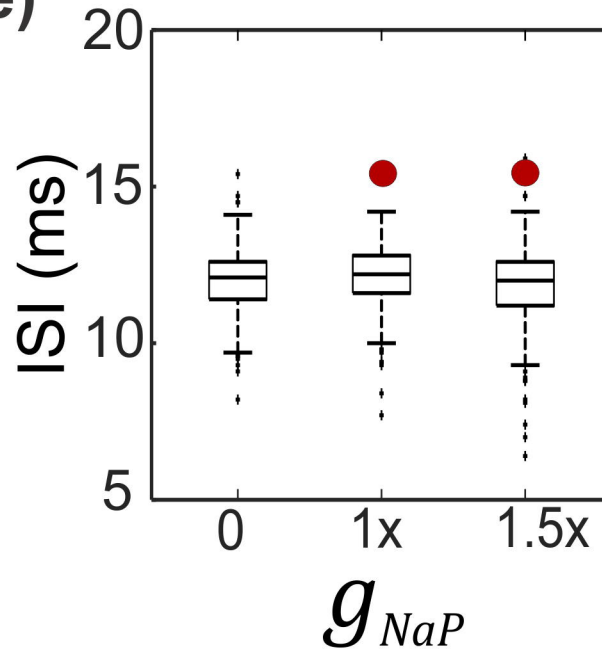

**Fig. 6.  $I_{NaR}$  facilitates slow  $Na^+$  inactivation**

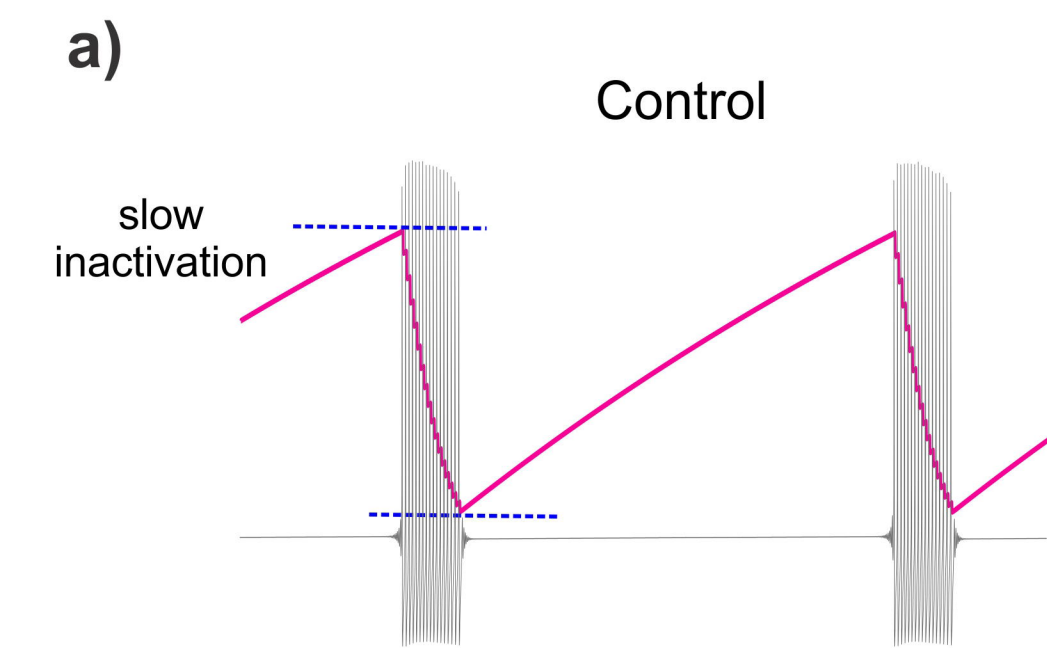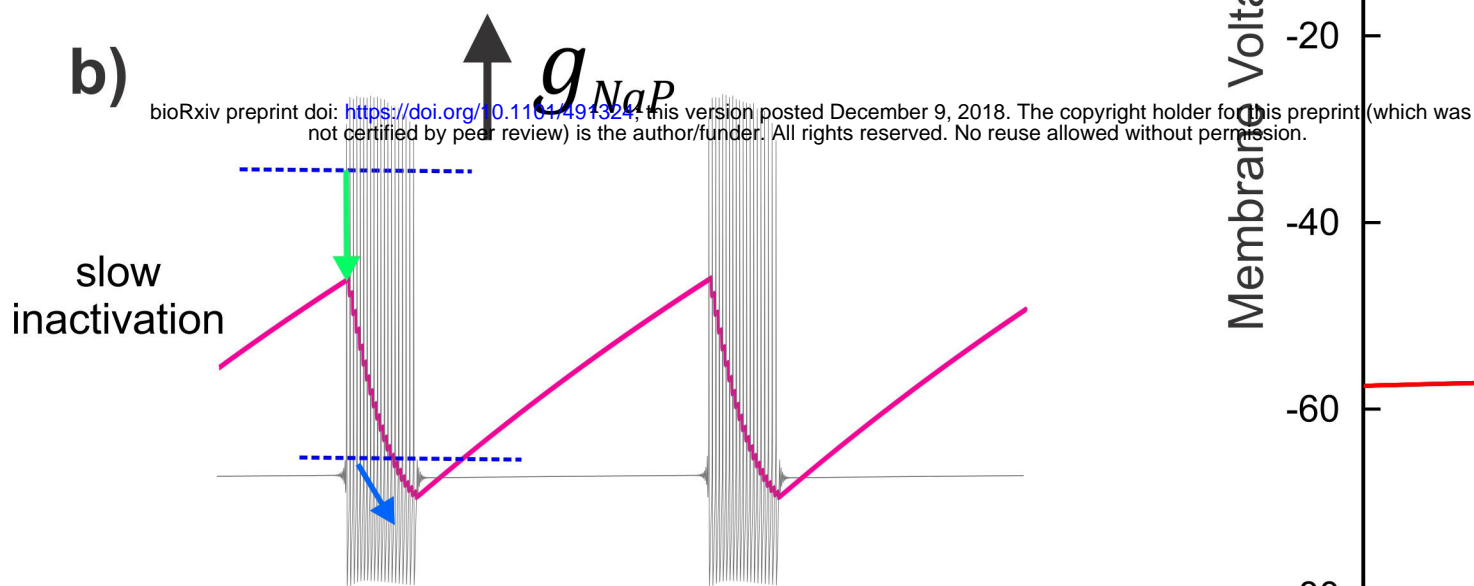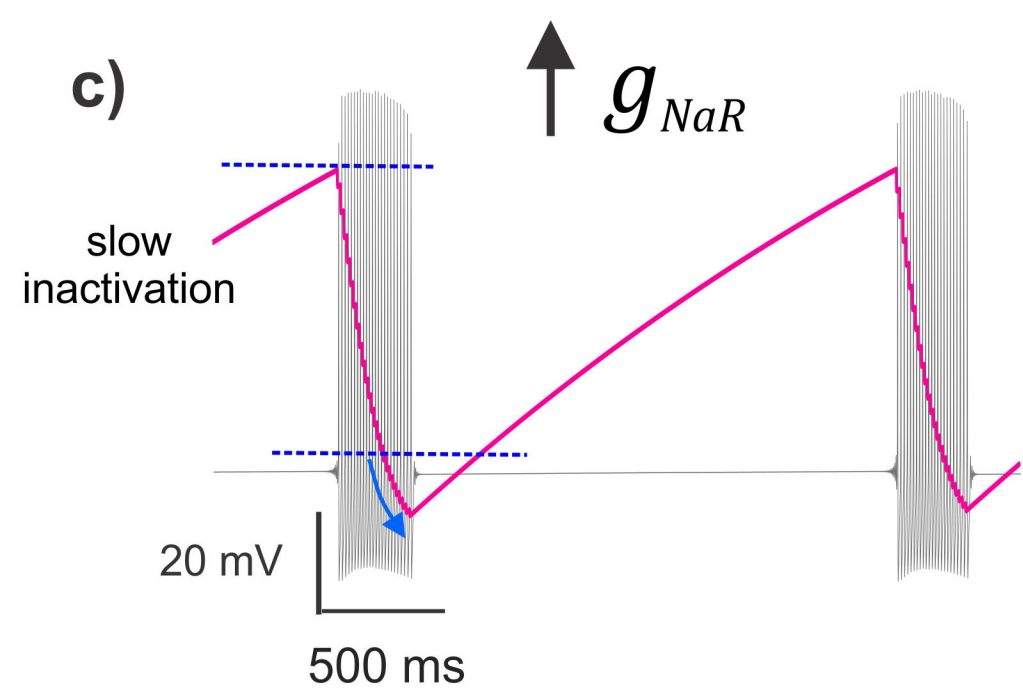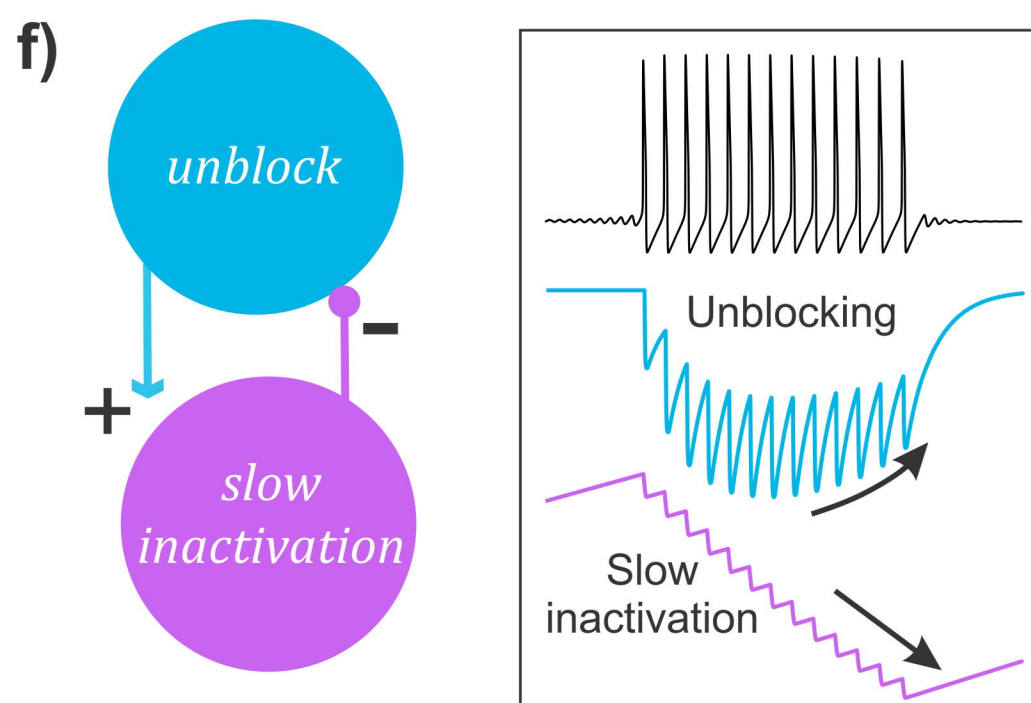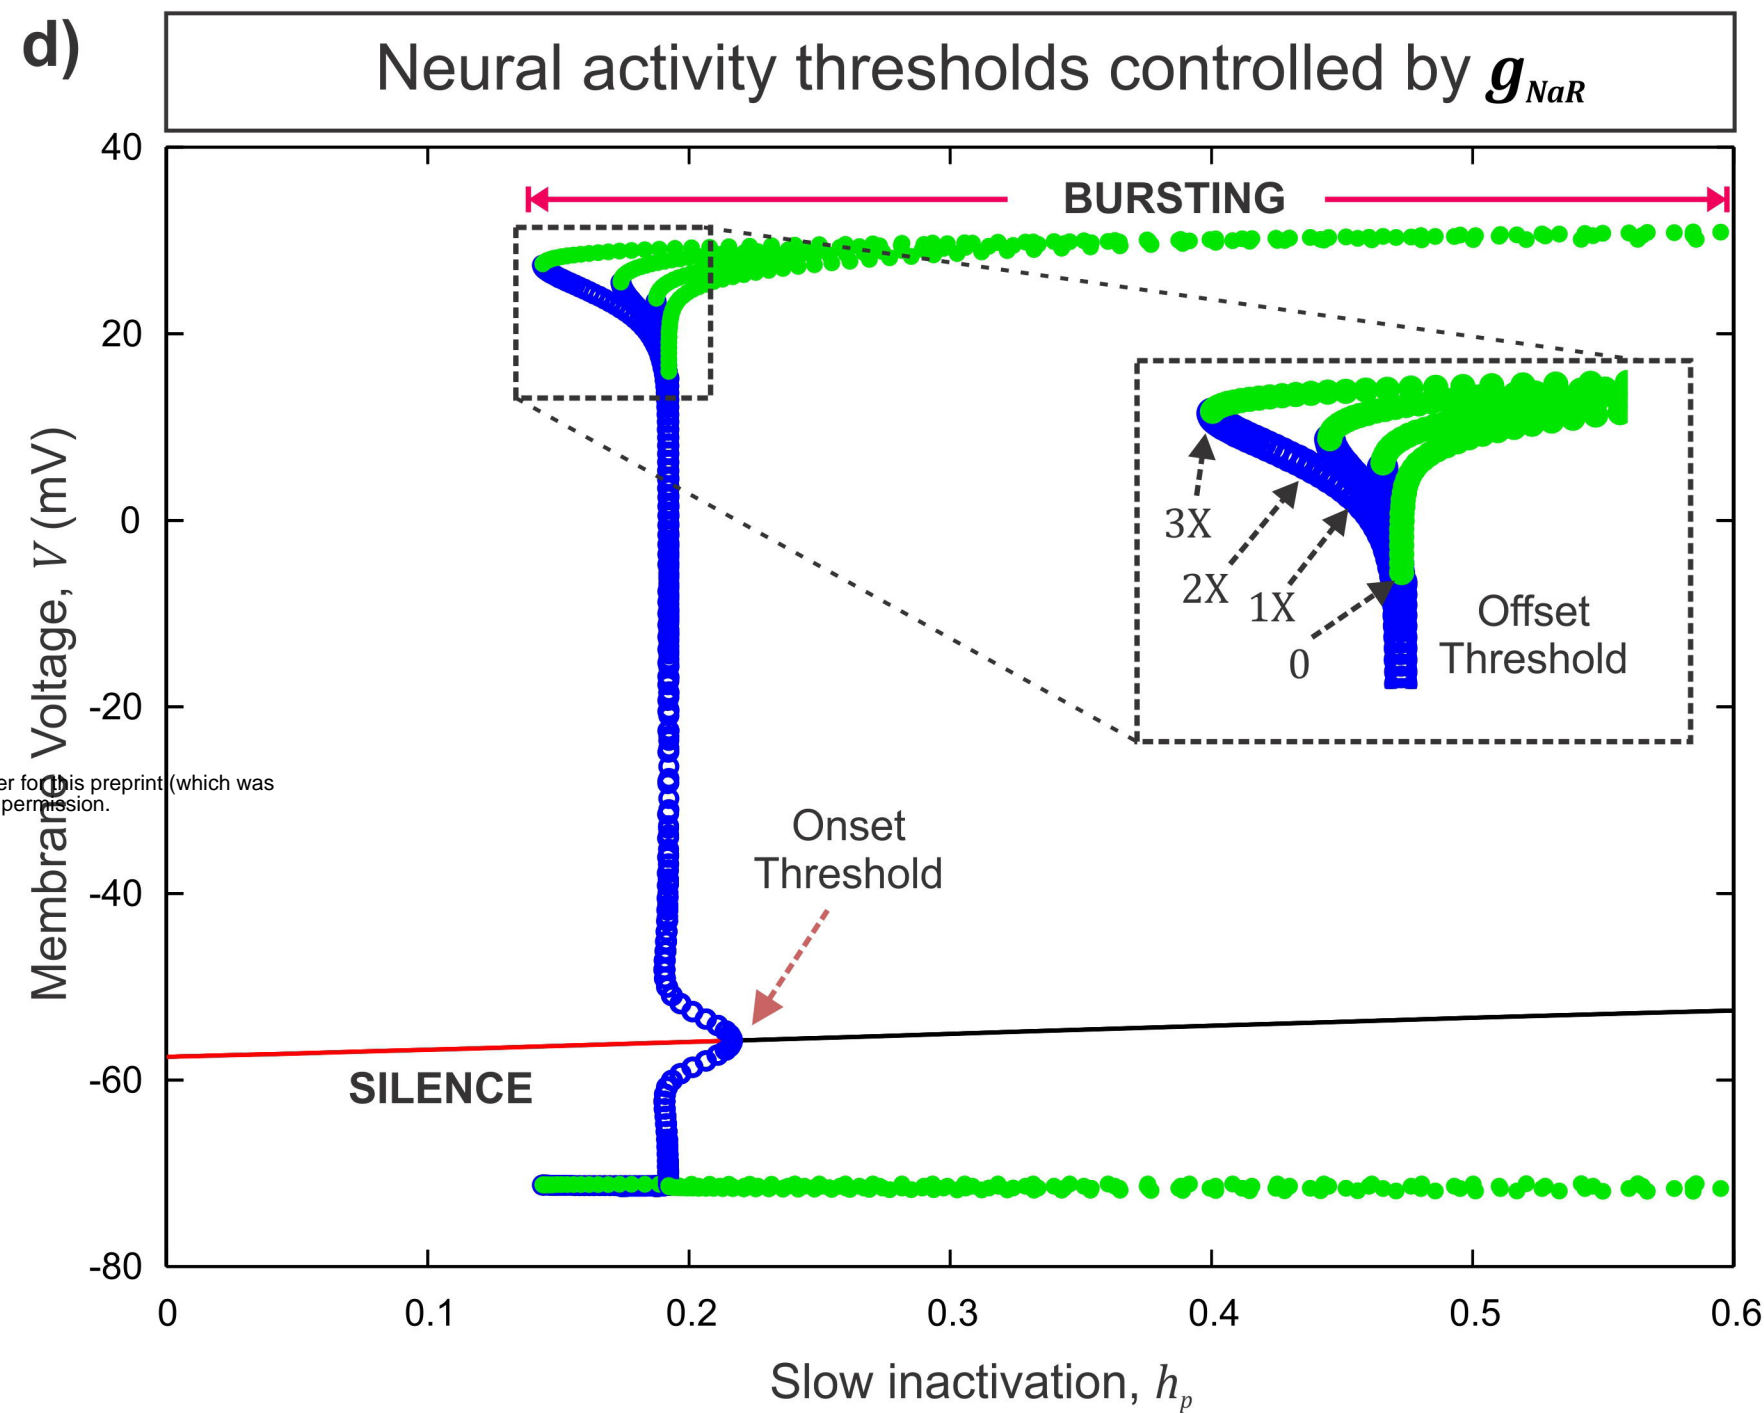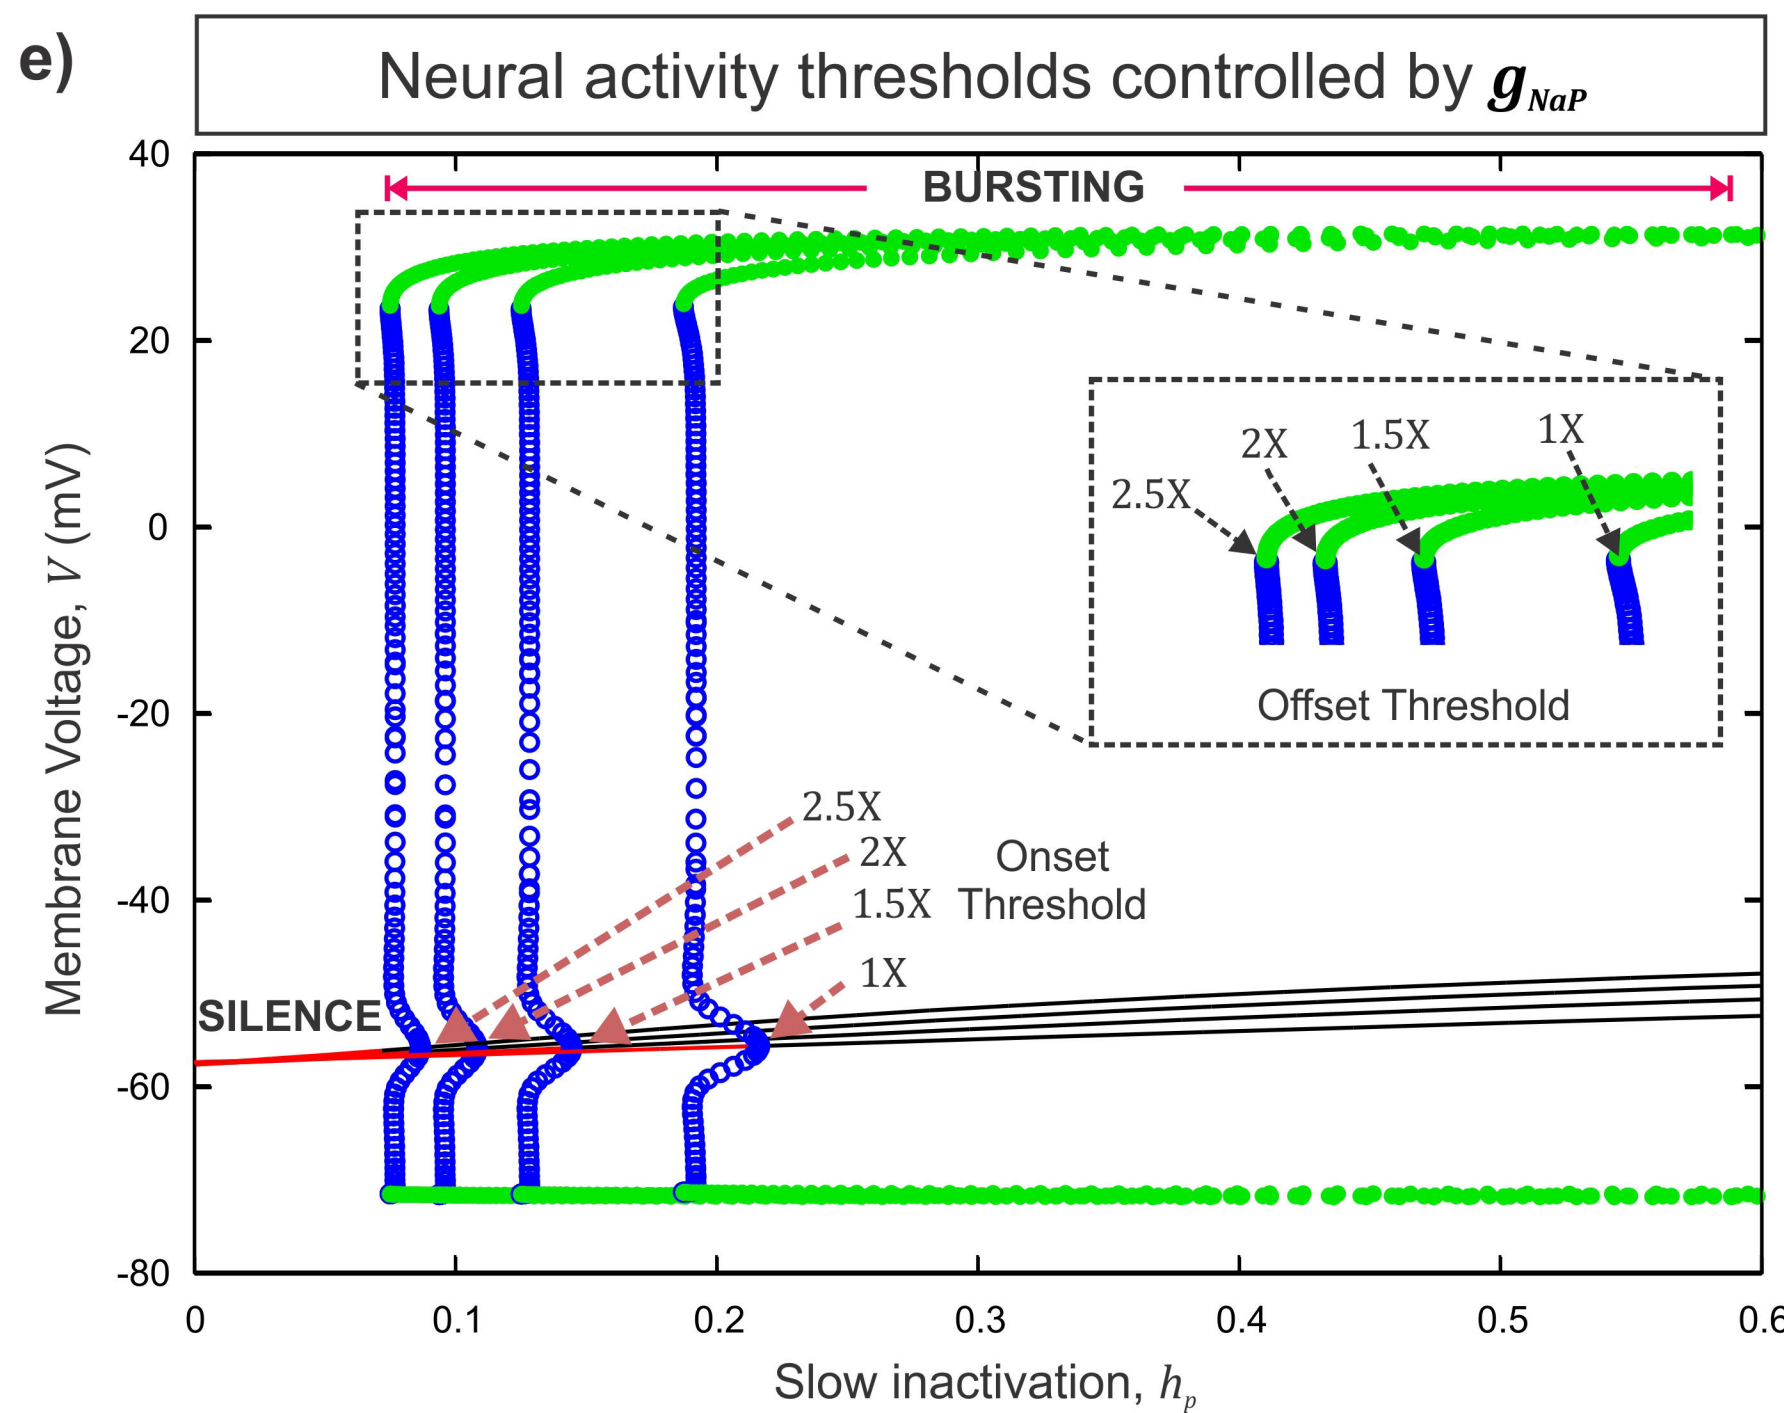

**Fig. 7. Burst refractoriness and noise tolerance conferred by  $I_{NaR}$**

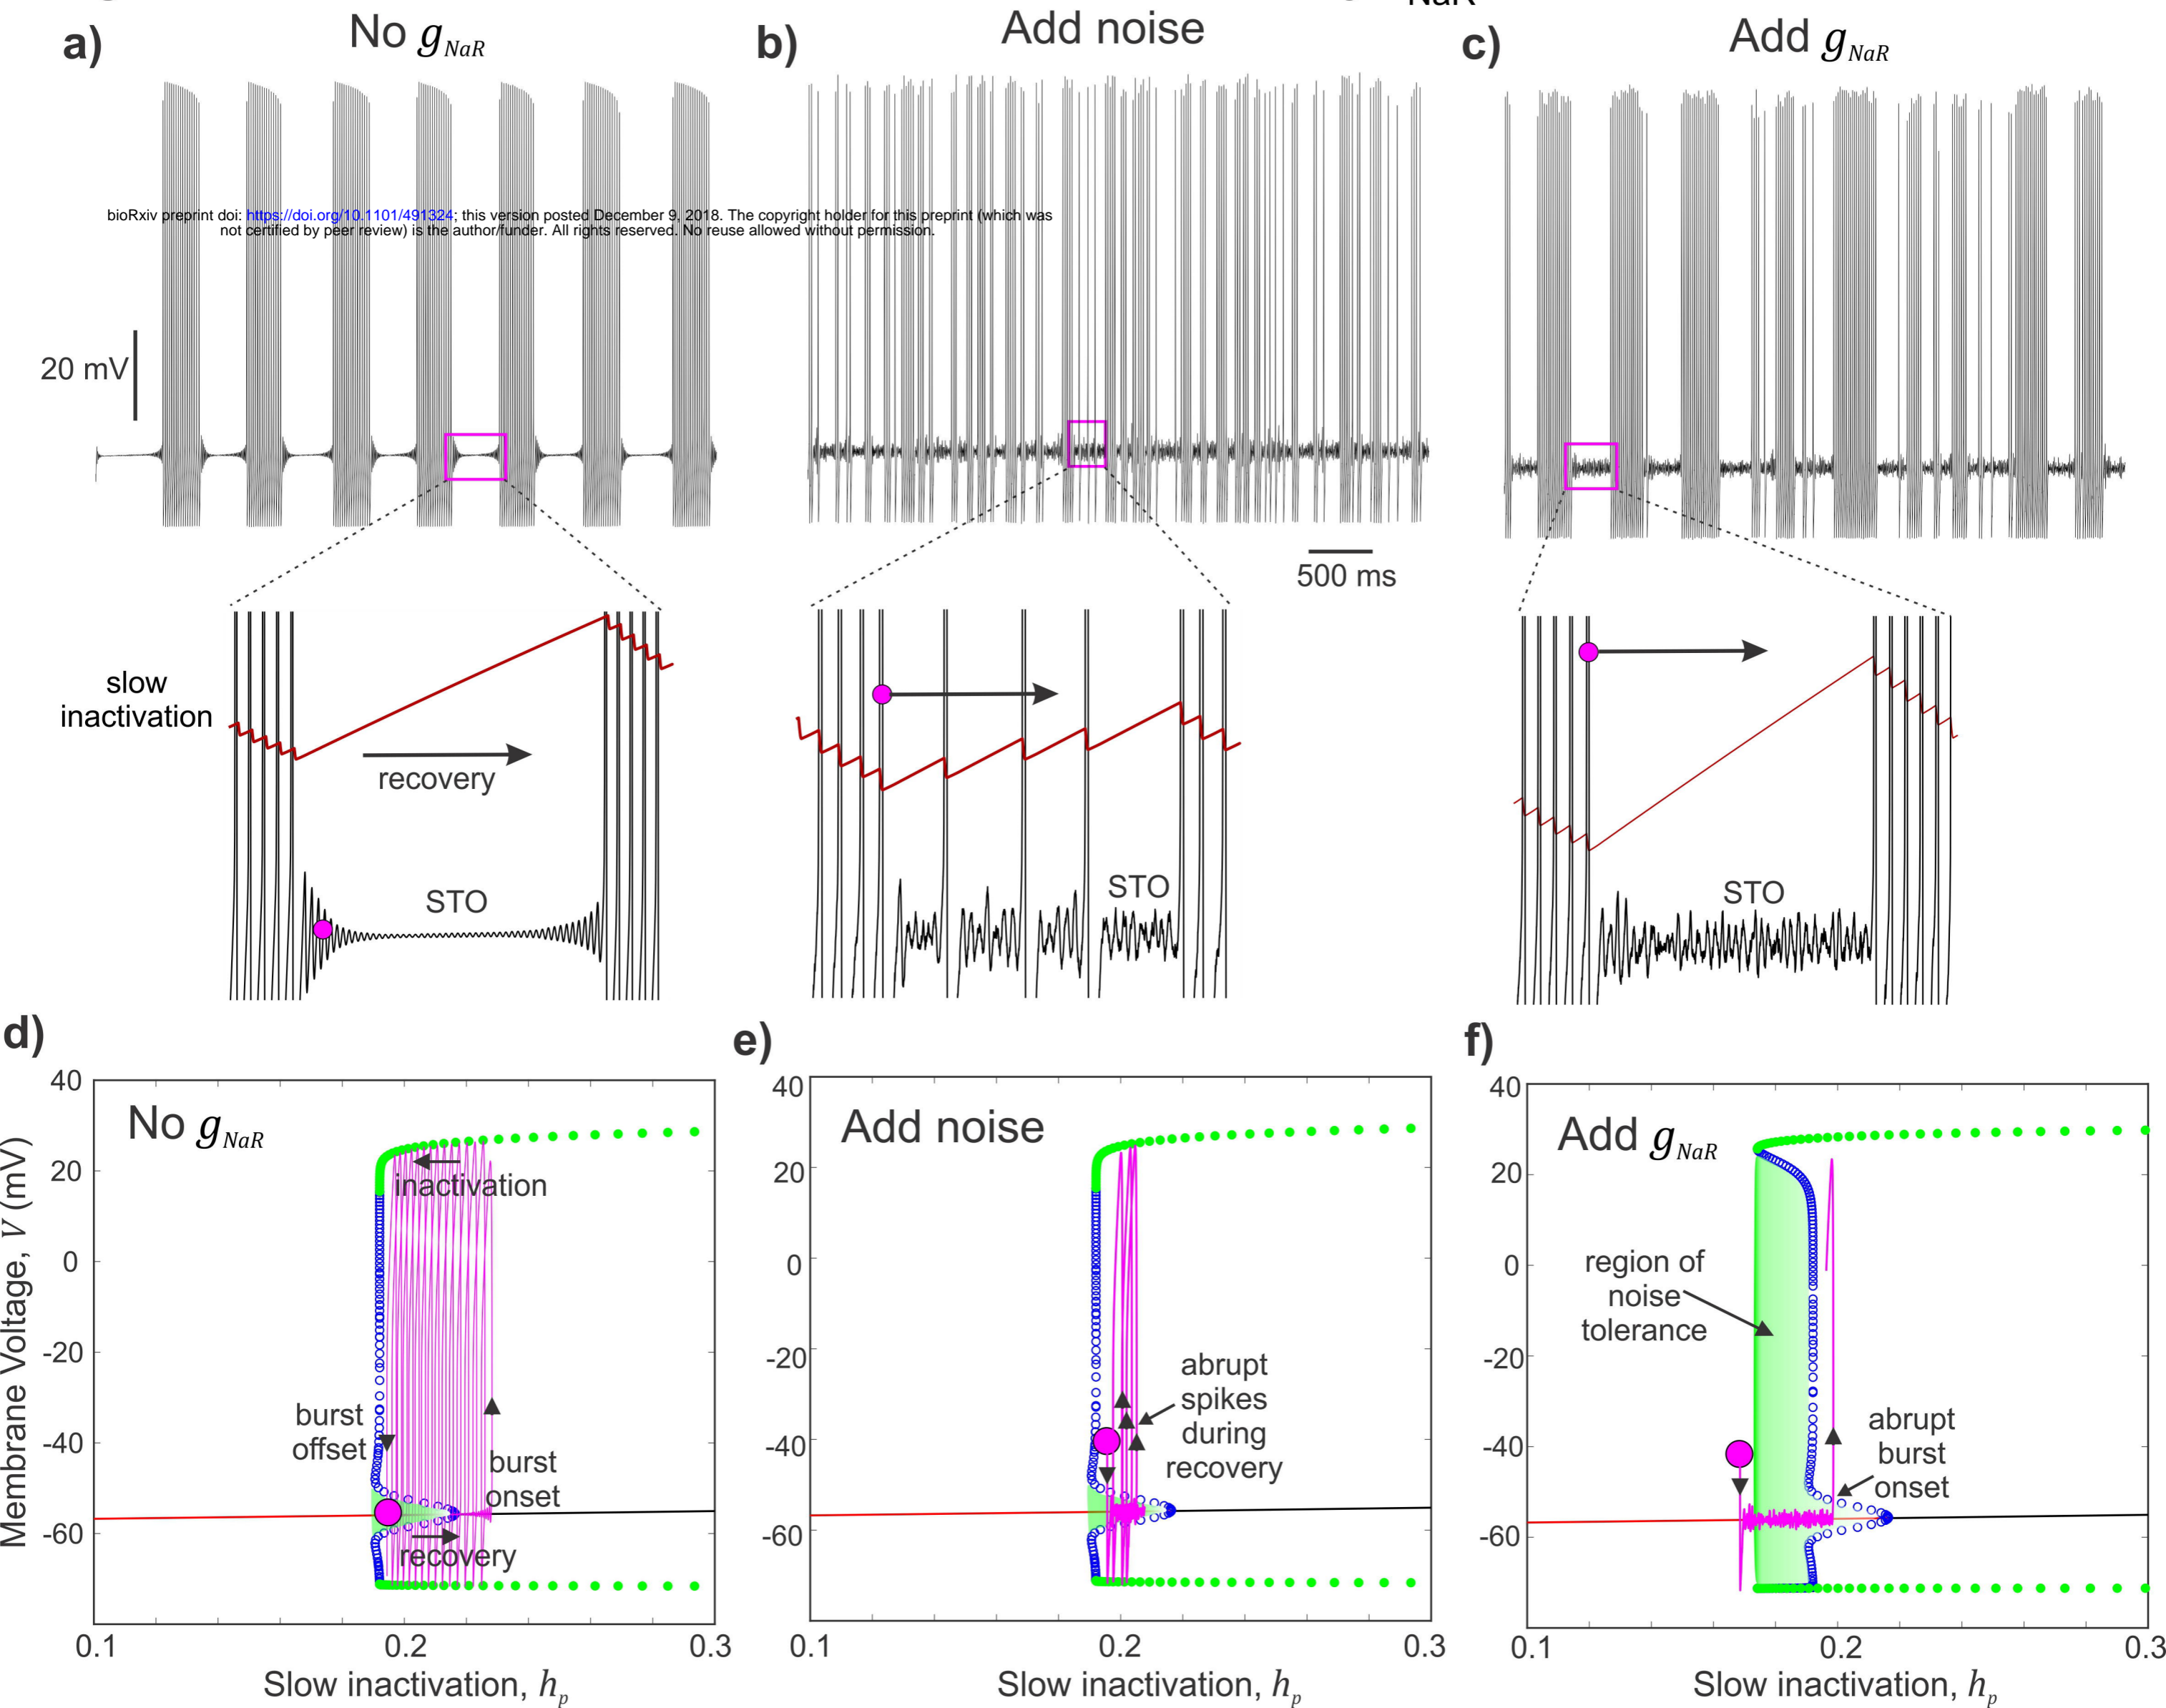



**Fig. 8.  $I_{NaR}$  maintains order of bursts**

a)

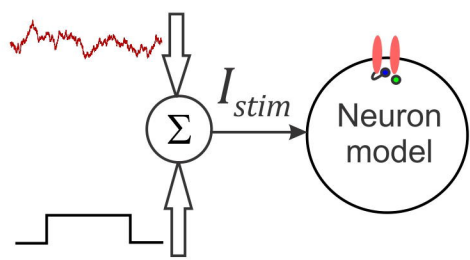

b)

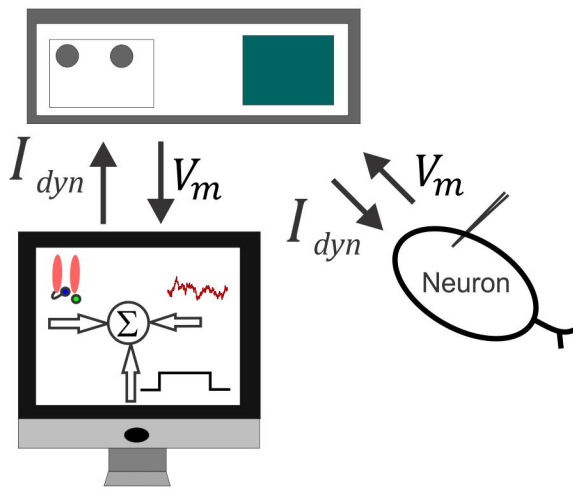

c)

MODEL PREDICTION  
(simulations)

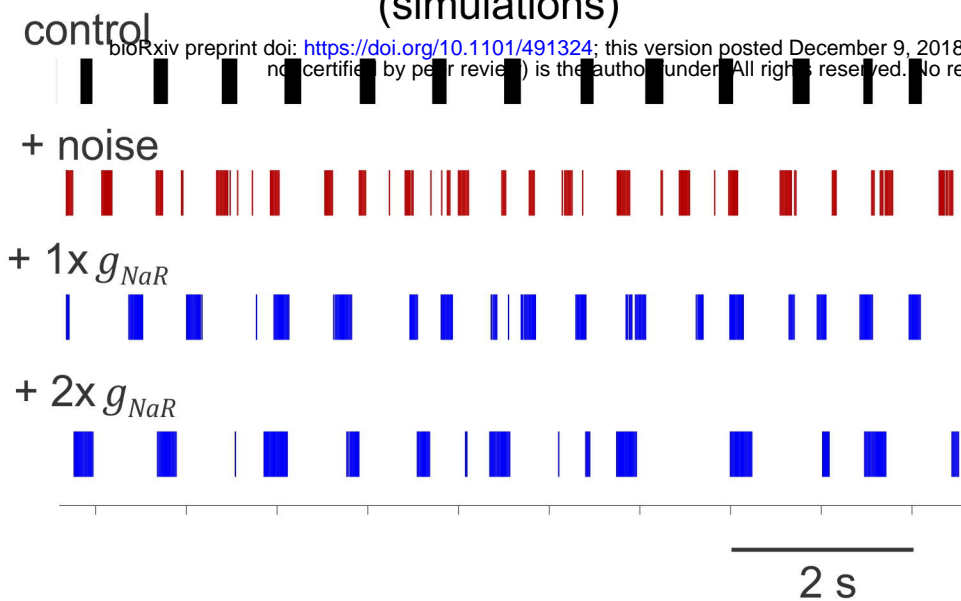

d)

EXPERIMENTAL VALIDATION  
(closed-loop dynamic-clamp)

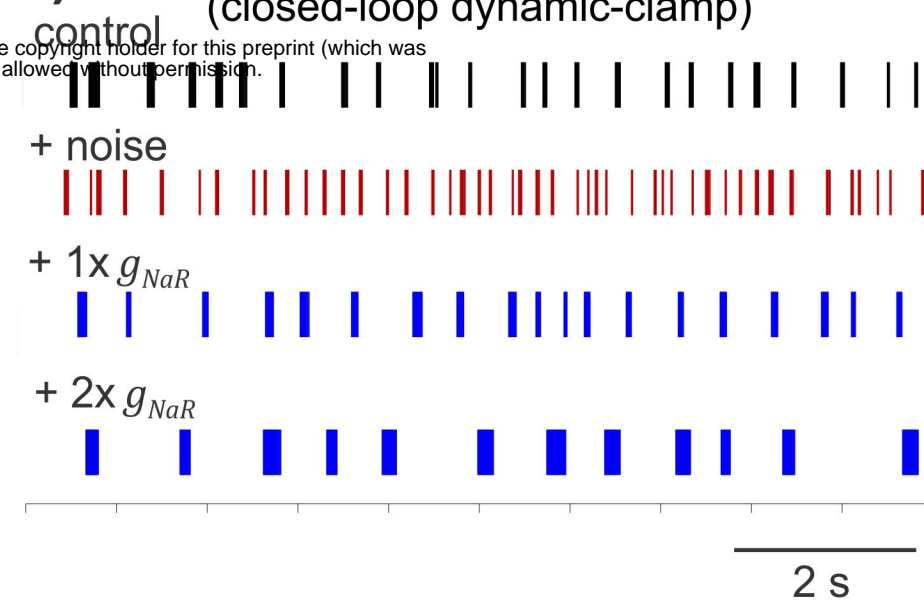

e)

MODEL

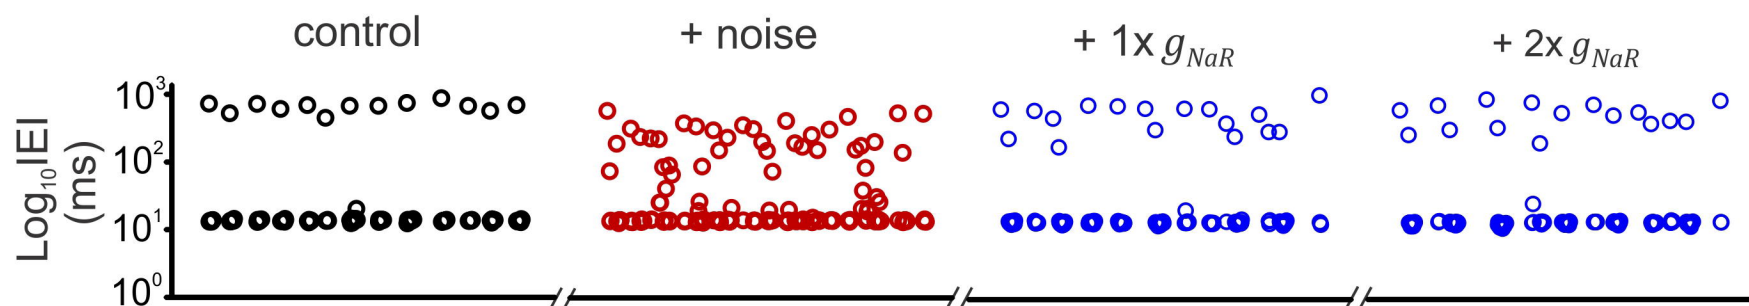

f)

EXPERIMENTS

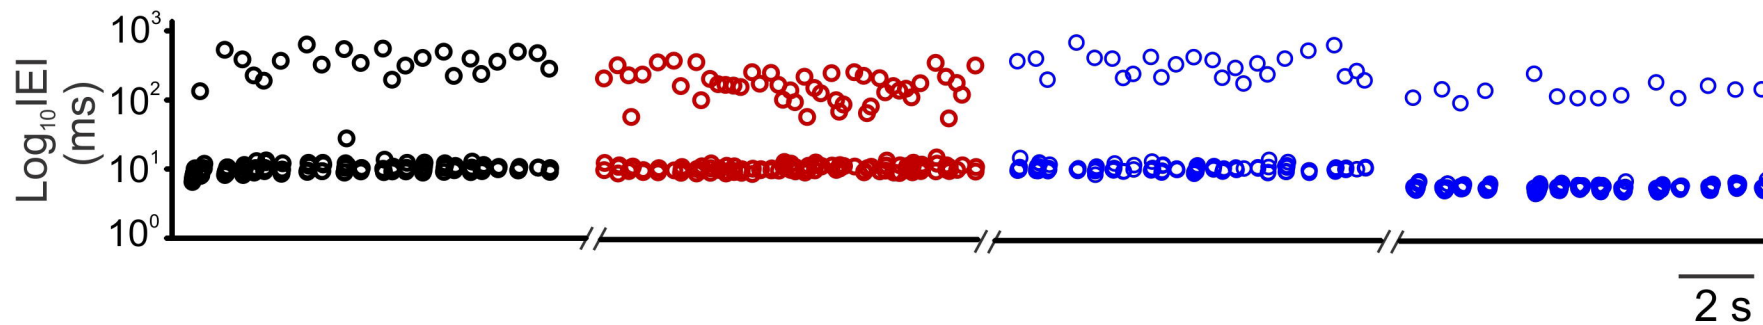

g)

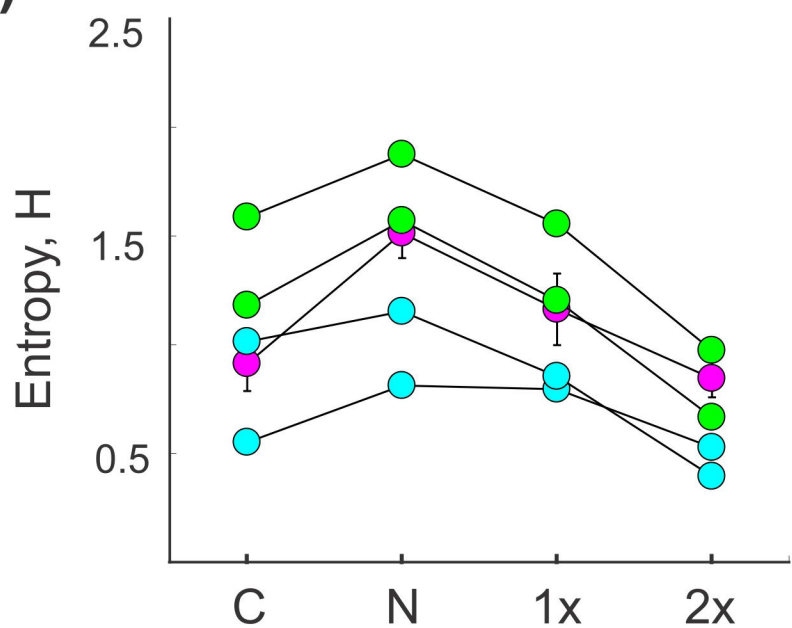

h)

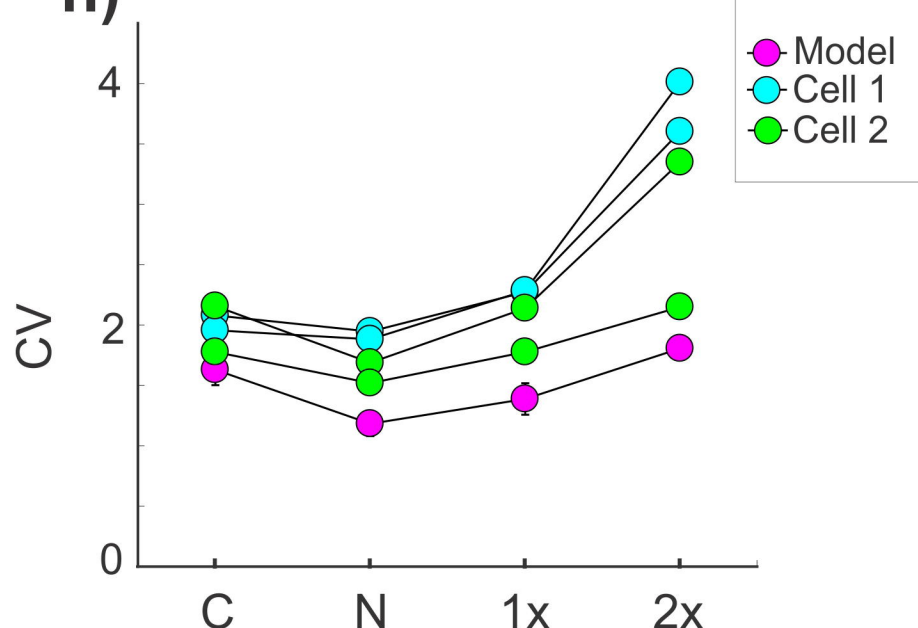

# Fig. 9. A Tune-In-Tune-Out mechanism

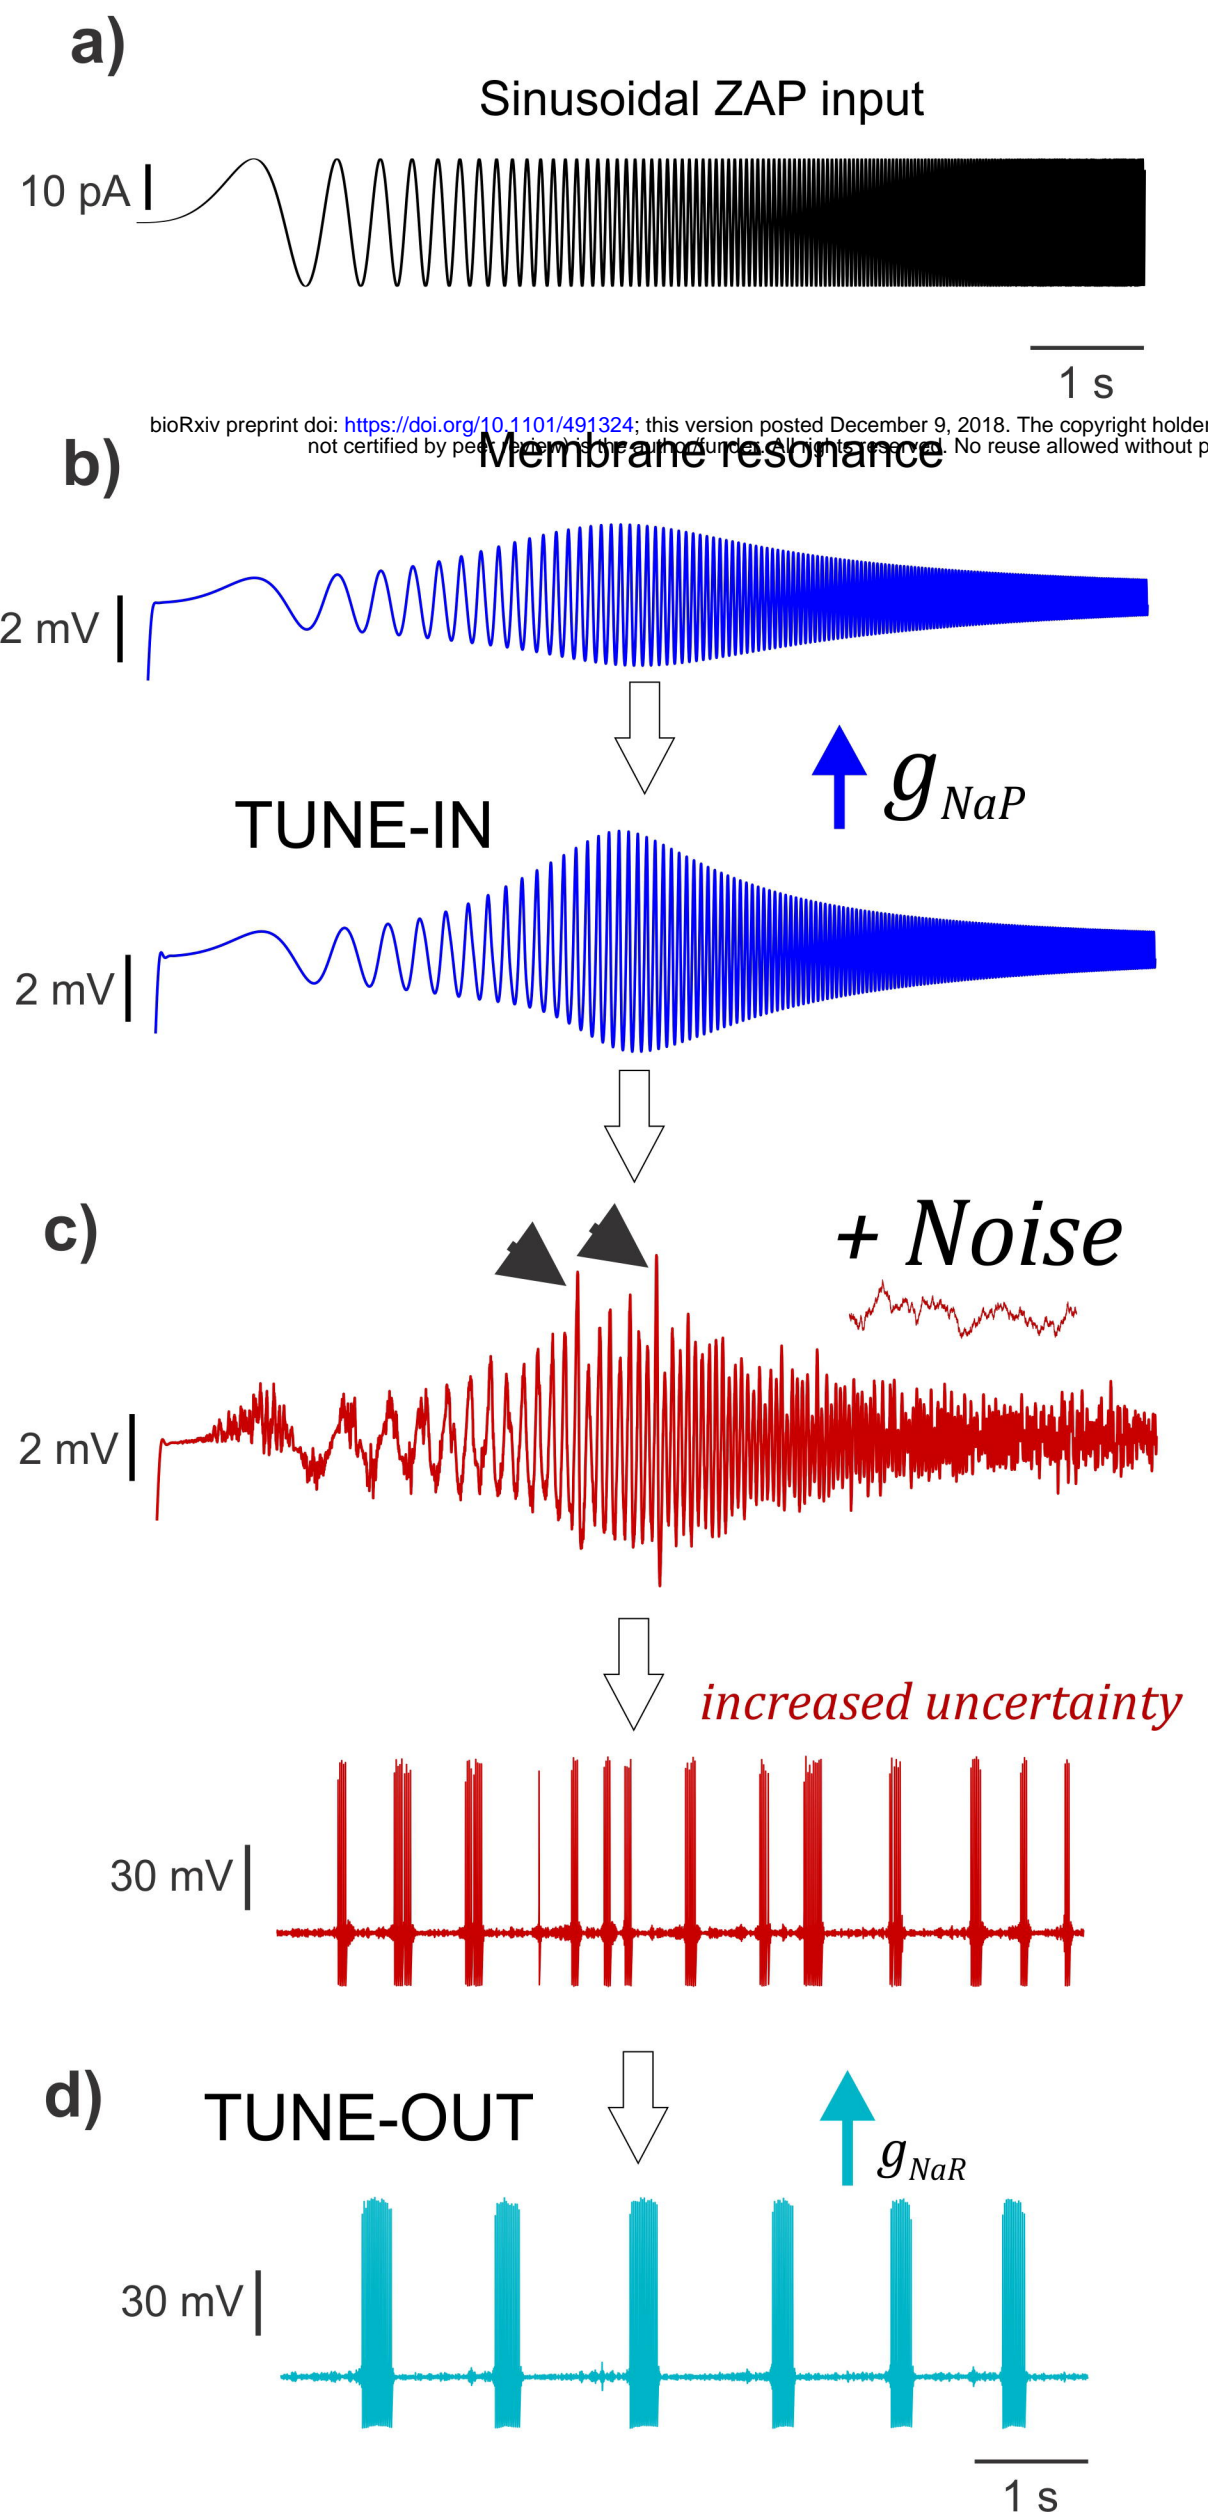

Source: https://www.biorxiv.org/content/10.1101/491324v1.full.pdf
